1 UPF3A and UPF3B are redundant and modular activators of  
2 nonsense-mediated mRNA decay in human cells  
3

4 Damaris Wallmeroth<sup>1,2</sup>, Volker Boehm<sup>1,2</sup>, Jan-Wilm Lackmann<sup>3</sup>, Janine Altmüller<sup>4,5</sup>, Christoph  
5 Dieterich<sup>6,7</sup>, Niels H. Gehring<sup>1,2</sup>

6

7 1 Institute for Genetics, University of Cologne, 50674 Cologne, Germany

8 2 Center for Molecular Medicine Cologne (CMMC), University of Cologne, 50937 Cologne,  
9 Germany

10 3 CECAD Research Center, University of Cologne, Joseph-Stelzmann-Str. 26, 50931  
11 Cologne, Germany

12 4 Cologne Center for Genomics (CCG), University of Cologne, 50931 Cologne, Germany

13 5 Present address: Berlin Institute of Health at Charité – Universitätsmedizin Berlin, Core  
14 Facility Genomics, Charitéplatz 1, 10117 Berlin, Germany and Max Delbrück Center for  
15 Molecular Medicine in the Helmholtz Association (MDC), Berlin, Germany

16 6 Section of Bioinformatics and Systems Cardiology, Department of Internal Medicine III and  
17 Klaus Tschira Institute for Integrative Computational Cardiology, Heidelberg University  
18 Hospital, 69120 Heidelberg, Germany

19 7 DZHK (German Centre for Cardiovascular Research), Partner site Heidelberg/Mannheim,  
20 69120 Heidelberg, Germany

21

22 \*Correspondence: [boehmv@uni-koeln.de](mailto:boehmv@uni-koeln.de) (V.B.), [ngehring@uni-koeln.de](mailto:ngehring@uni-koeln.de) (N.H.G.)

23

24 Keywords

25 Nonsense-mediated mRNA decay, gene paralogs, mRNA turnover, UPF3

26

## 27 **Abstract**

28 The paralogous human proteins UPF3A and UPF3B are involved in recognizing mRNAs  
29 targeted by nonsense-mediated mRNA decay (NMD). While UPF3B has been demonstrated  
30 to support NMD, contradicting reports describe UPF3A either as an NMD activator or inhibitor.  
31 Here, we present a comprehensive functional analysis of UPF3A and UPF3B in human cells  
32 using combinatory experimental approaches. Overexpression or knockout of UPF3A as well  
33 as knockout of UPF3B did not detectably change global NMD activity. In contrast, the co-  
34 depletion of UPF3A and UPF3B resulted in a marked NMD inhibition and a transcriptome-wide  
35 upregulation of NMD substrates, demonstrating a functional redundancy between both NMD  
36 factors. Although current models assume that UPF3 bridges NMD-activating exon-junction  
37 complexes (EJC) to the NMD factor UPF2, UPF3B exhibited normal NMD activity in rescue  
38 experiments when UPF2 or EJC binding was impaired. Further rescue experiments revealed  
39 partially redundant functions of UPF3B domains in supporting NMD, involving both UPF2 and  
40 EJC interaction sites and the central region of UPF3. Collectively, UPF3A and UPF3B serve  
41 as fault-tolerant NMD activators in human cells.

42

## 43 Introduction

44 Precisely regulated expression of correct gene products is indispensable for eukaryotic life.  
45 This is underlined by the existence of several quality control mechanisms for gene expression,  
46 one of which is the nonsense-mediated mRNA decay (NMD). NMD is primarily known for its  
47 ability to eliminate mature mRNAs that contain a premature termination codon (PTC). Thereby,  
48 NMD prevents the synthesis and accumulation of C-terminally truncated proteins, which may  
49 possess undesirable and potentially disease-causing properties (Frischmeyer & Dietz, 1999).  
50 Although the removal of PTC-containing mRNAs was initially considered the most important  
51 function of NMD, later studies showed that NMD plays an important role in the post-  
52 transcriptional regulation of a substantial part of the transcriptome (He *et al.*, 2003; Lelivelt &  
53 Culbertson, 1999; Mendell *et al.*, 2004; Rehwinkel *et al.*, 2005). The importance of the factors  
54 involved in NMD is underscored by the severe impact that mutations in components of this  
55 machinery have on development in metazoans, up to causing embryonic lethality in mammals  
56 (Hwang & Maquat, 2011; Li *et al.*, 2015; McIlwain *et al.*, 2010; Medghalchi *et al.*, 2001;  
57 Metzstein & Krasnow, 2006; Weischenfeldt *et al.*, 2008; Wittkopp *et al.*, 2009).

58 The final step of gene expression is the cytoplasmic translation of the mRNA by ribosomes.  
59 Previous studies suggested that prolonged ribosome stalling at a termination codon indicates  
60 improper translation termination and thereby triggers NMD (Amrani *et al.*, 2004; Peixeiro *et al.*,  
61 2012). This could be caused by a long 3' untranslated region (UTR) that increases the distance  
62 between the stalled ribosome and the poly(A)-binding protein (PABPC1), which normally  
63 promotes proper translation termination (Amrani *et al.*, 2004). Alternatively, NMD can also be  
64 activated by any PTC located more than 50-55 nt upstream of the 3'-most exon-exon junction.  
65 Transcripts with such a PTC may be transcribed from mutant genes with nonsense mutations  
66 but could also be generated by defective or alternative splicing (Kervestin & Jacobson, 2012).  
67 The aforementioned 50-55 nt boundary between NMD-activating and NMD-resistant PTCs is  
68 determined by the RNA-binding exon junction complex (EJC), which is deposited by the  
69 spliceosome 20-24 nt upstream of every spliced exon-exon junction (Le Hir *et al.*, 2000). The

70 EJCs remain attached on the mature mRNA during export into the cytoplasm, where they are  
71 removed by translating ribosomes or the disassembly factor PYM1 (Dostie & Dreyfuss, 2002;  
72 Le Hir *et al.*, 2000). If translation terminates prematurely due to the presence of a PTC, EJCs  
73 bound downstream of the PTC serve as a marker for the NMD machinery and the initial  
74 activation of NMD (Kim *et al.*, 2001; Le Hir *et al.*, 2001).

75 Extensive research over many decades has resulted in a model for EJC-dependent NMD.  
76 According to this model, the central factor UPF1 is bound non-specifically to all present  
77 transcripts in the cell and is removed from the coding sequence by translating ribosomes (Hogg  
78 & Goff, 2010; Hurt *et al.*, 2013; Kurosaki & Maquat, 2013; Zund *et al.*, 2013). If translation  
79 terminates prematurely, UPF1 interacts with the stalled ribosome and serves as the anchoring  
80 point for the other NMD factors. The presence of a downstream EJC is detected by the  
81 interaction of UPF1 with UPF2, which in turn binds to UPF3. The latter can bind directly to the  
82 EJC, resulting in a bridged connection of UPF1 to the EJC (Chamieh *et al.*, 2008; Kim *et al.*,  
83 2001; Le Hir *et al.*, 2001; Weng *et al.*, 1996). This series of interactions marks the termination  
84 codon as premature and stimulates the phosphorylation of N- and C-terminal SQ motif-  
85 containing regions of UPF1 by the kinase SMG1 (Yamashita *et al.*, 2001). In its phosphorylated  
86 state UPF1 recruits the heterodimer SMG5-SMG7 and/or SMG6, which are responsible for  
87 both exoribonucleolytic and endoribonucleolytic degradation of the mRNA, respectively  
88 (Boehm *et al.*, 2021; Chen & Shyu, 2003; Lejeune *et al.*, 2003). The endonuclease SMG6  
89 cleaves the mRNA in close proximity to the PTC, resulting in two mRNA fragments (Eberle *et*  
90 *al.*, 2009) of which the 3' fragment is degraded by the 5'-to-3' exoribonuclease XRN1 (Eberle  
91 *et al.*, 2009; Huntzinger *et al.*, 2008).

92 The protein UPF3 plays an important role in the NMD pathway. As detailed above, its main  
93 function is believed to bridge the NMD machinery to the EJC providing a physical link between  
94 UPF2 and the EJC (Chamieh *et al.*, 2008; Kashima *et al.*, 2006; Lykke-Andersen *et al.*, 2000;  
95 Serin *et al.*, 2001). With its conserved RNA recognition motif (RRM) in the N-terminus, UPF3  
96 can interact with the C-terminal MIF4G (middle portion of eIF4G) domain of UPF2 (Kadlec *et*

97 *al.*, 2004). The association with the EJC-binding site, formed by the core components EIF4A3,  
98 MAGOHB and RBM8A, is enabled by a C-terminal sequence referred to as EJC binding motif  
99 (EBM) (Buchwald *et al.*, 2010; Gehring *et al.*, 2003; Kim *et al.*, 2001).

100 In vertebrates two genes encode for two UPF3 paralogues: UPF3A and UPF3B, each of which  
101 expressing two different isoforms generated by alternative splicing (Lykke-Andersen *et al.*,  
102 2000; Serin *et al.*, 2001). Both human UPF3 proteins contain the same important domains, but  
103 differ in details regarding their interactions. According to previous studies, UPF3A and UPF3B  
104 are in constant competition for their binding partner UPF2. However, UPF3B binds tighter to  
105 UPF2 than UPF3A and therefore UPF3A gets destabilized, and its protein levels are barely  
106 detectable under normal conditions (Chan *et al.*, 2009).

107 Recently, UPF3B was reported to interact with the eukaryotic release factor 3 (eRF3) via the  
108 so far uncharacterized middle domain (amino acids (aa) 147-256) (Neu-Yilik *et al.*, 2017). Due  
109 to this interaction and binding of the terminating ribosome, it can delay translation termination,  
110 which is known to define aberrant termination events and trigger NMD (Amrani *et al.*, 2004;  
111 Neu-Yilik *et al.*, 2017; Peixeiro *et al.*, 2012).

112 Due to the different molecular characteristics of the UPF3 paralogs, their exact role in NMD is  
113 a long-discussed topic. On the one hand, previous studies showed that UPF3A and UPF3B  
114 both trigger degradation of a reporter construct when tethered downstream of a termination  
115 codon. Notably, the efficiency of UPF3A to elicit NMD was weaker in comparison to UPF3B,  
116 which was attributed to a weaker interaction with the EJC (Kunz *et al.*, 2006; Lykke-Andersen  
117 *et al.*, 2000). This would suggest that, at least with respect to their NMD activity, UPF3A and  
118 UPF3B serve a similar, perhaps even redundant, function. This notion is supported by the  
119 observation that in patients with mutated UPF3B the amount of stabilized UPF3A inversely  
120 correlated with the severity of the patients' clinical phenotypes (Nguyen *et al.*, 2012). On the  
121 other hand, it was recently reported that loss of UPF3A results in increased transcript  
122 destabilization, and UFP3A overexpression in NMD inhibition (Shum *et al.*, 2016). This would

123 rather indicate opposing functions of the two UPF3 paralogs with UPF3A being an antagonist  
124 of UPF3B and broadly acting as an NMD inhibitor.

125 In this study, we resolved the controversy about the functions of UPF3A and UPF3B in the  
126 NMD pathway using different UPF3 overexpression and knockout (KO) HEK293 cell lines. We  
127 found that neither overexpression nor genomic KO of UPF3A resulted in substantial changes  
128 of NMD activity or global alterations of the transcriptome. In UPF3B KO cells UPF3A protein  
129 levels were upregulated, but NMD activity was maintained at almost normal level. In contrast,  
130 the co-depletion of both UPF3 paralogs resulted in a marked NMD inhibition and a global  
131 upregulation of PTC-containing transcripts. Moreover, rescue experiments revealed that UPF3  
132 proteins have additional functions besides bridging the EJC and the NMD machinery. Taken  
133 together, our data support a model of human NMD, in which UPF3A and UPF3B can replace  
134 each other and therefore perform redundant functions.

## 135 **RESULTS**

### 136 **UPF3A overexpression or knockout does not affect NMD efficiency**

137 Prior work using different mammalian models and various experimental approaches reached  
138 different conclusions regarding the function of UPF3A in NMD ([Fig 1A](#)). Therefore, we set out  
139 to re-examine the role of UPF3A in human cells by specifically manipulating its expression  
140 levels. Under regular conditions UPF3A is barely present in cultured cells, presumably due to  
141 its lower binding affinity to the stabilizing interaction partner UPF2 compared to UPF3B,  
142 resulting in a rapid turnover of “free” UPF3A (*Chan et al.*, 2009). We hypothesized that  
143 increasing the abundance of UPF3A should lead to the stabilization of NMD targets if UPF3A  
144 is an NMD inhibitor. To test this hypothesis, we generated Flp-In T-REx 293 (HEK 293) cells  
145 inducibly overexpressing FLAG-tagged wildtype UPF3A to high protein levels ([Fig 1B](#)). Global  
146 analysis of the transcriptome using RNA-seq ([Fig EV1A](#) and [Datasets EV1-EV3](#)) revealed,  
147 except for UPF3A itself, no significant differential gene expression (DGE), differential transcript  
148 usage (DTU) or alternative splicing (AS) events upon UPF3A overexpression compared to  
149 control conditions ([Figs 1C](#) and [D](#)). Using these RNA-seq data, we analyzed NMD targets that  
150 were previously described to be strongly upregulated in UPF3A overexpressing HeLa cells  
151 (*Shum et al.*, 2016). The DGE analysis and visualization of the respective read coverage  
152 showed no substantial effects in our setup ([Figs 1E](#) and [EV1B-E](#)). Furthermore, quantification  
153 of differential transcript usage via IsoformSwitchAnalyzeR (*Vitting-Seerup & Sandelin*, 2019)  
154 could neither detect any differences in the global isoform fraction distribution, nor an  
155 accumulation of PTC-containing transcripts ([Fig EV1F](#)). Collectively, these analyses indicated  
156 that UPF3A overexpression in HEK 293 cells does not negatively affect gene expression in  
157 general or NMD in particular.

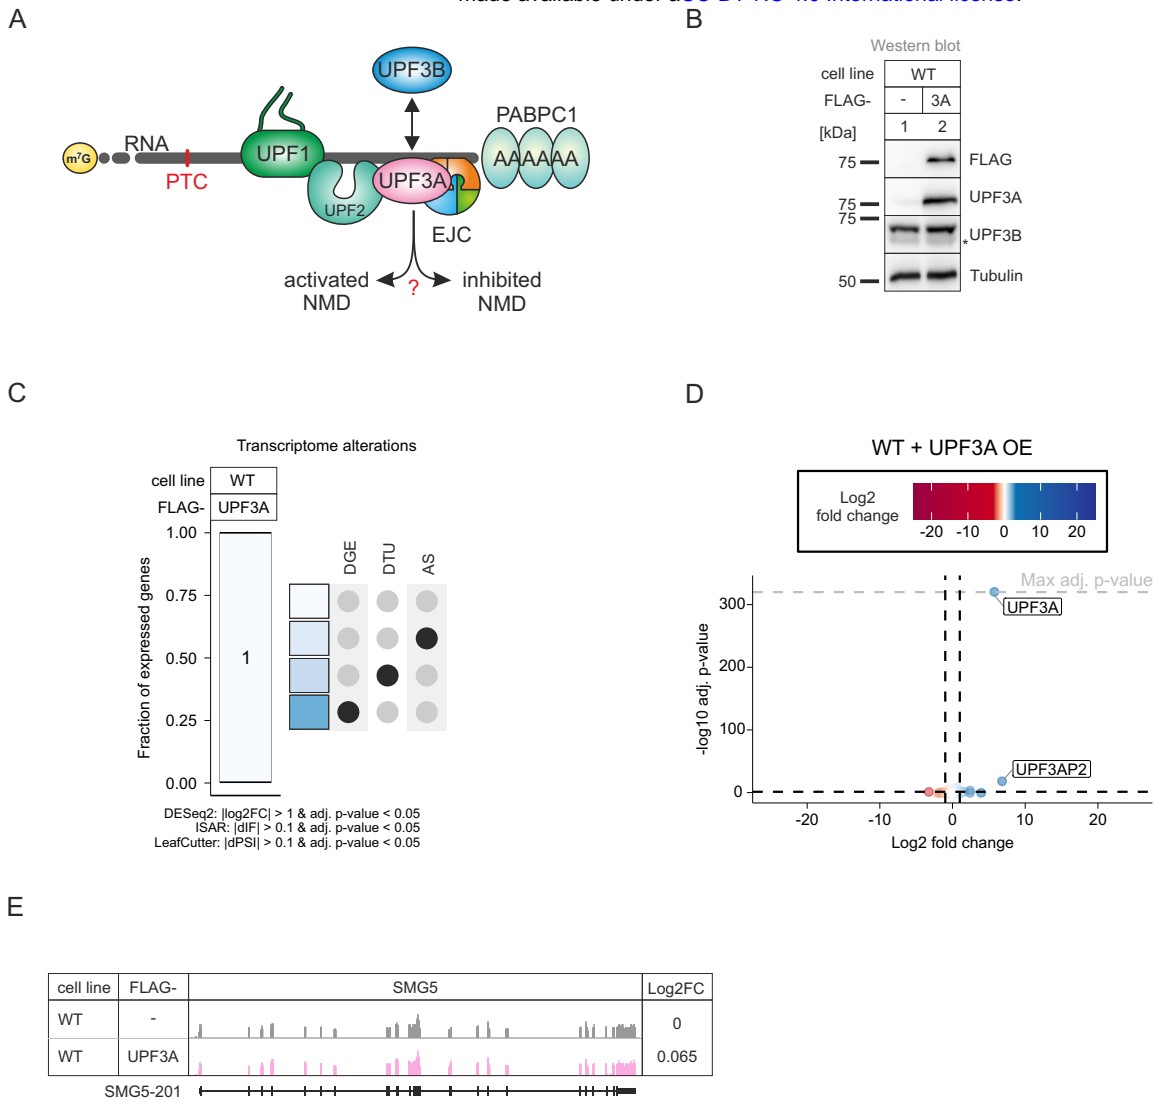

**Figure 1 - UPF3A overexpression does not affect NMD**

**A** Schematic representation of the bridge between UPF1 and the EJC during NMD. Binding of UPF3A instead of the stronger bound UPF3B is discussed to either activate or inhibit NMD.

**B** Western blot analyses after induced expression of FLAG-tagged UPF3A in WT HEK 293 cells. Tubulin serves as control.

**C** Fraction of expressed genes (genes with non-zero counts in DESeq2) were calculated which exhibit individual or combinations of differential gene expression (DGE), differential transcript usage (DTU) and/or alternative splicing (AS) events in WT cells overexpressing UPF3A using the respective computational analysis (cutoffs are indicated). AS and DTU events were collapsed on the gene level. For DGE, p-values were calculated by DESeq2 using a two-sided Wald test and corrected for multiple testing using the Benjamini-Hochberg method. For DTU, p-values were calculated by IsoformSwitchAnalyzeR (ISAR) using a DEXSeq-based test and corrected for multiple testing using the Benjamini-Hochberg method. For AS, p-values were calculated by LeafCutter using an asymptotic Chi-squared distribution and corrected for multiple testing using the Benjamini-Hochberg method.

**D** Volcano plot showing the differential gene expression analyses from the RNA-Seq dataset of WT cells overexpressing UPF3A. The log<sub>2</sub> fold change is plotted against the -log<sub>10</sub> adjusted p-value (adj. p-value). P-values were calculated by DESeq2 using a two-sided Wald test and corrected for multiple testing using the Benjamini-Hochberg method. OE = overexpression.

**E** Read coverage of SMG5 from WT HEK 293 RNA-seq data with or without induced UPF3A overexpression shown as Integrative Genomics Viewer (IGV) snapshot. Differential gene expression (from DESeq2) is indicated as Log<sub>2</sub> fold change (Log<sub>2</sub>FC) on the right. Schematic representation of the protein coding transcript below.



159 Next, we approached the question of UPF3A function in the opposite way by generating  
160 UPF3A knockout (KO) HEK 293 cell lines. Using CRISPR-Cas9 genome editing we isolated  
161 three clones that lacked the UPF3A-specific band on the Western blot even after  
162 downregulation of UPF3B (Fig 2A). Two clones (14 and 20) were characterized in detail.

163 In both cell lines, the UPF3A genomic locus contained insertions and/or deletions causing  
164 frame-shifts and eventually PTCs (Figs EV2A-C). To gain a first impression of the NMD activity  
165 in the UPF3A KO cells, the transcript levels of three known exemplary endogenous NMD  
166 targets, RSRC2, SRSF2 and ZFAS1 were determined by qPCR (Boehm *et al.*, 2021; Lykke-  
167 Andersen *et al.*, 2014; Sureau *et al.*, 2001). WT HEK 293 cells treated with SMG6 and SMG7  
168 siRNAs were used as a positive control for severe NMD inhibition (Fig 2B)(Boehm *et al.*, 2021).  
169 While the absence of UPF3A did not result in abundance changes of SRSF2 and RSRC2  
170 NMD-sensitive isoforms (mean log<sub>2</sub>FC between -0.44 and 0.79), ZFAS1 mRNA levels were  
171 slightly decreased in the UPF3A KO cells compared to WT cells (mean log<sub>2</sub>FC -0.42 and -1.01  
172 for UPF3A KO clones 14 and 20, respectively; Fig 2B). However, this effect was not rescued  
173 by the (over)expression of transgenic UPF3A, indicating that it is not caused by the lack of  
174 UPF3A but rather represents random variations in gene expression or clonal effects (Figs  
175 EV2D-E). To get a complete overview of the effects of the UPF3A KO, we performed RNA-seq  
176 of two UPF3A KO cell lines with or without an additional UPF3B knockdown (KD; Fig EV2F  
177 and Datasets EV1-EV3). Initially, we focused on the UPF3A KO cell lines without KDs, for  
178 which the global transcriptome analysis revealed that about 4-9 % of the expressed genes are  
179 altered (Figs 2C-E). The observation that in the absence of UPF3A more genes were  
180 downregulated than upregulated (879 vs. 676) could be an indicator for UPF3A NMD inhibiting  
181 properties (Fig 2F). However, the majority of genes with altered expression were clone specific  
182 and only 110 genes showed downregulation in both UPF3A KO cell lines (Fig 2F). Investigation  
183 of selected targets that were significantly up- or downregulated in both clones revealed that  
184 the changes were not rescued after UPF3A overexpression, suggesting that they are UPF3A-  
185 independent (Figs EV2D-E). Another indication that UPF3A depletion does not generally affect  
186 NMD efficiency came from the DTU analysis.

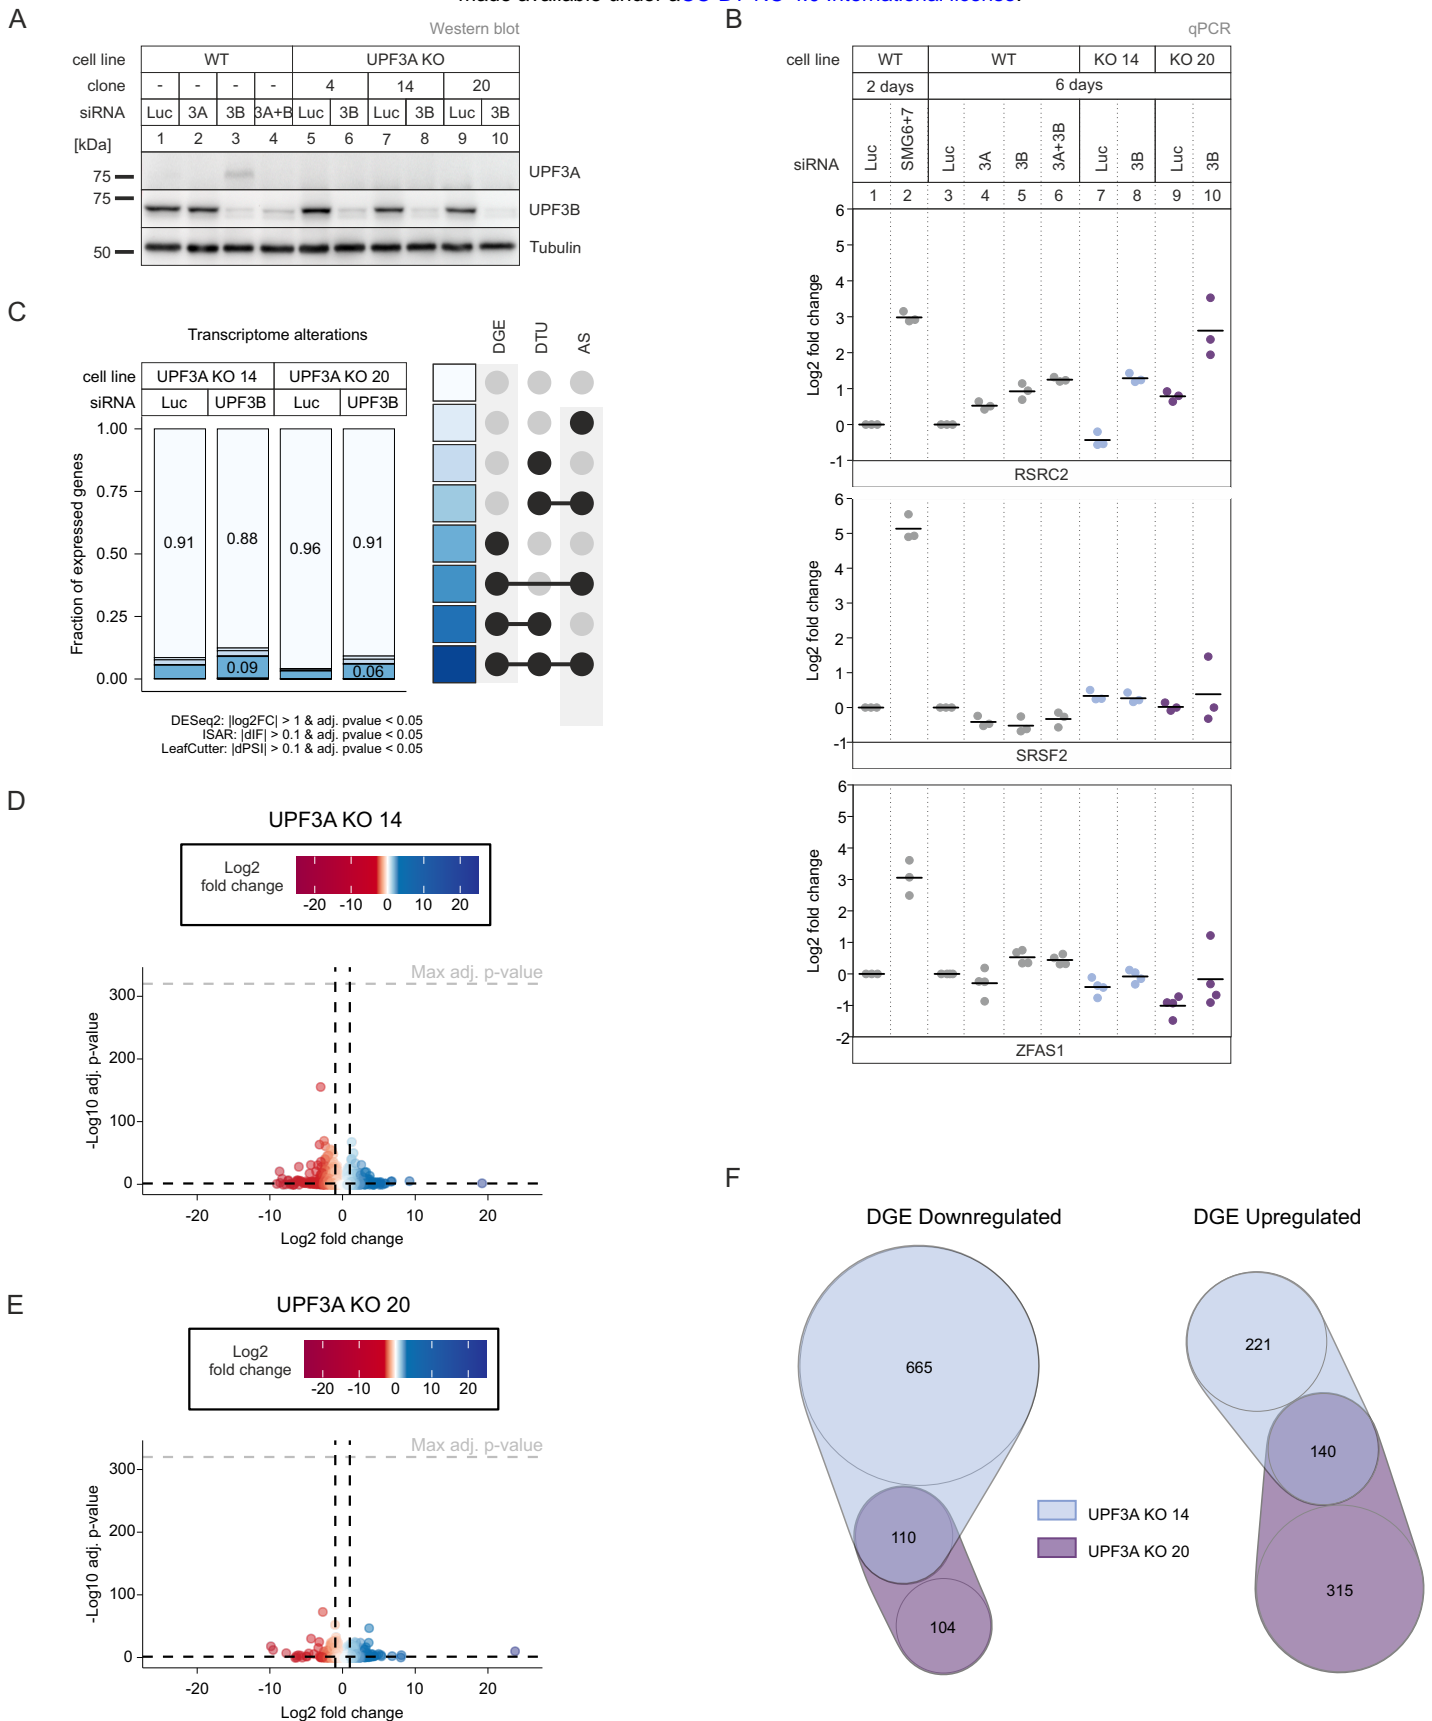

**Figure 2 - UPF3A KOs show light NMD-independent transcriptome alterations**

**A** Western blot analysis of WT and UPF3A KO cells (clones 4, 14 and 20) with the indicated siRNA treatments. UPF3A and UPF3B protein levels were detected, Tubulin serves as control.

**B** Quantitative RT-PCR of the indicated cell lines treated with the indicated siRNA treatments for 2 or 6 days. For RSRC2 and SRSF2 the ratio of NMD isoform to canonical isoform was calculated. ZFAS1 expression was normalized to C1orf43 reference. Data points and means are plotted as Log<sub>2</sub> fold change (n=3 for RSRC2 and SRSF2, n=4 for ZFAS1).

**C** Fraction of expressed genes (genes with non-zero counts in DESeq2) were calculated which exhibit individual or combinations of differential gene expression (DGE), differential transcript usage (DTU) and/or alternative splicing (AS) events in the indicated conditions using the respective computational analysis (cutoffs are indicated). AS and DTU events were collapsed on the gene level. For DGE, p-values were calculated by DESeq2 using a two-sided Wald test and corrected for multiple testing using the Benjamini-Hochberg method. For DTU, p-values were calculated by IsoformSwitchAnalyzeR using a DEXSeq-based test and corrected for multiple testing using the Benjamini-Hochberg method. For AS, p-values were calculated by LeafCutter using an asymptotic Chi-squared distribution and corrected for multiple testing using the Benjamini-Hochberg method.

**D,E** Volcano plots showing the differential gene expression analyses from the indicated RNA-Seq datasets (D UPF3A KO clone 14, E UPF3A KO clone 20). The log<sub>2</sub> fold change is plotted against the -log<sub>10</sub> adjusted p-value (padj). P-values were calculated by DESeq2 using a two-sided Wald test and corrected for multiple testing using the Benjamini-Hochberg method.

**F** nVenn Diagram showing the overlap of up- or downregulated genes in the UPF3A KO cell lines 14 and 20. Log<sub>2</sub> fold change <1 (downregulated) or >1 (upregulated) and adjusted p-value (padj) < 0.05. DGE = Differential Gene Expression.

188 Although clone 14 showed a minor downregulation of PTC-containing transcripts, which could  
189 indicate more active NMD, this effect was not reproducible in the second clone (Fig EV2G). In  
190 view of and in combination with the results shown in Fig 1, this strongly suggests that neither  
191 the overexpression nor the depletion of UPF3A substantially alters (negatively or positively)  
192 the efficiency of NMD. In conclusion, our data argue against a role for UPF3A as a general  
193 negative NMD regulator in human cell lines.

#### 194 **NMD is functional in the absence of UPF3B**

195 Next, we investigated the RNA-seq data of UPF3B knockdowns in the UPF3A KO cells  
196 (Datasets EV1-EV3). We observed that this combination resulted in more transcriptome  
197 alterations and an increase of PTC-containing isoforms (Figs 2B-C, EV2H and I). Although the  
198 UPF3B KD alone could be in principle responsible for this effect, the results could also be an  
199 indicator for redundant functions of the two UPF3 paralogs. To explore this hypothesis, we  
200 decided to generate UPF3B KO cell lines. Western blot analysis demonstrated that a UPF3B  
201 KD is less efficient in reducing the produced protein than the UPF3B KO in the two clones  
202 designated as 90 and 91 (Figs 3A and EV3A-B). In addition, we observed a strong upregulation  
203 of UPF3A after depletion (KO) or reduction (KD) of UPF3B, as described before (Chan *et al.*,  
204 2009). In the absence of UPF3B no changes in the expression of the respective NMD-sensitive  
205 isoforms of the NMD-targets RSRC2 and SRSF2 was observed (Fig 3B). This indicates that  
206 either UPF3B is not essential for NMD or that another protein is able to compensate for its  
207 loss. The most obvious candidate for this function is its own paralog UPF3A, which was also  
208 suggested previously to functionally replace UPF3B in NMD. Indeed, knocking down UPF3A  
209 in the UPF3B KO cells resulted in the increase of NMD-sensitive RSRC2 and SRSF2 isoforms  
210 (Fig 3B). Of note, the combination of the UPF3B KO with UPF3A KD showed stronger effects  
211 than the previously analyzed UPF3A KO plus UPF3B KD. This is probably caused by the lower  
212 KD efficiency of the UPF3B siRNAs which can be observed by comparing the respective  
213 protein levels (Fig 2A vs. Fig 3A). We suspect that the remaining UPF3B levels after siRNA-  
214 mediated UPF3B KD still support NMD.

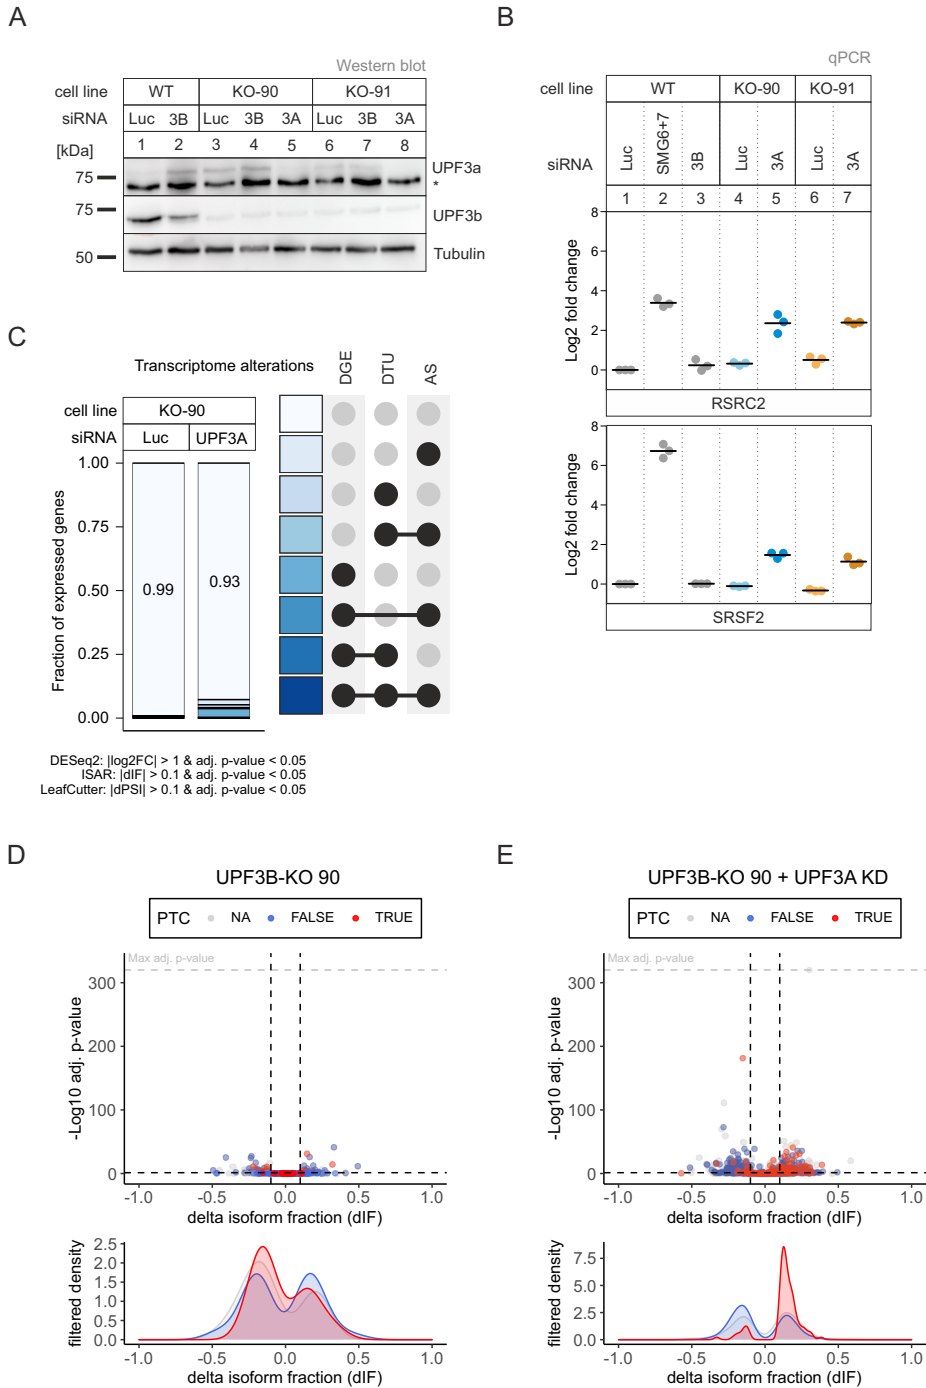

**Figure 3 - Loss of UPF3B does not affect NMD efficiency, only in combination with KD of UPF3A**

**A** Western blot analysis of WT and UPF3B KO cells (clones 90 and 91) combined with the indicated knockdowns. UPF3A and UPF3B (AK-141) protein levels were detected, Tubulin serves as control.

**B** Quantitative RT-PCR of the indicated cell lines with the indicated knockdowns. For RSRC2 and SRSF2 the ratio of NMD isoform to canonical isoform was calculated. Data points and means are plotted as Log<sub>2</sub> fold change (n=3).

**C** Fraction of expressed genes (genes with non-zero counts in DESeq2) were calculated which exhibit individual or combinations of differential gene expression (DGE), differential transcript usage (DTU) and/or alternative splicing (AS) events in the indicated conditions using the respective computational analysis (cutoffs are indicated). AS and DTU events were collapsed on the gene level. For DGE, p-values were calculated by DESeq2 using a two-sided Wald test and corrected for multiple testing using the Benjamini-Hochberg method. For DTU, p-values were calculated by IsoformSwitchAnalyzeR using a DEXSeq-based test and corrected for multiple testing using the Benjamini-Hochberg method. For AS, p-values were calculated by LeafCutter using an asymptotic Chi-squared distribution and corrected for multiple testing using the Benjamini-Hochberg method.

**D, E** Volcano plots showing the differential transcript usage (via IsoformSwitchAnalyzeR) in various RNA-Seq data. Isoforms containing GENCODE (release 33) annotated PTC (red, TRUE), regular stop codons (blue, FALSE) or having no annotated open reading frame (grey, NA) are indicated. The change in isoform fraction (dIF) is plotted against the -log<sub>10</sub> adjusted p-value (adj. p-value). Density plots show the distribution of filtered isoforms in respect to the dIF, cutoffs were |dIF| > 0.1 and adj. p-value < 0.05. P-values were calculated by IsoformSwitchAnalyzeR using a DEXSeq-based test and corrected for multiple testing using the Benjamini-Hochberg method.

216 To gain more transcriptome-wide information, we performed RNA-seq of the UPF3B KO clone  
217 90, with and without UPF3A siRNA treatment (Fig EV3C and Datasets EV1-EV3). The global  
218 effects detected in the RNA-seq data correlated well with the NMD inhibition seen for single  
219 targets (Figs 3C and EV3D-G). Analysis of the differential transcript usage revealed an  
220 upregulation of transcripts annotated with a PTC only in the UPF3B KO cells with additionally  
221 downregulated UPF3A (Figs 3D and E). This increase of NMD-sensitive transcripts could not  
222 be observed in the plain UPF3B KO cells with UPF3A naturally upregulated. All together this  
223 data strongly suggested at least partial redundancy of UPF3A and UPF3B, since KO of only  
224 one paralog was irrelevant for NMD functionality. Furthermore, we were able to show that also  
225 in the absence of UPF3B an overexpression of UPF3A has no negative effects on NMD  
226 efficiency, supporting the previous conclusion of UPF3A not being a negative NMD regulator  
227 (Figs EV3H and I).

### 228 **Stronger NMD impairment in UPF3A-UPF3B double KO cells**

229 Considering that UPF3A and UPF3B seemingly carry out redundant functions, we decided to  
230 create a cell line completely lacking both paralogs and aimed to generate UPF3A-UPF3B  
231 double KO cells (UPF3 dKO). These cells should show stronger effects than the combination  
232 of a KO and a KD, since residual amounts of protein were typically still detected after siRNA  
233 treatment. Using the UPF3B-KO clone 90 as parental cell line, two potential UPF3 dKO clones  
234 1 and 2 were generated (Fig 4A), which differed in the guide RNAs used to target exon 1 of  
235 UPF3A. We confirmed that both cell lines contained frame shift-inducing insertions/deletions  
236 at the respective positions in the UPF3A gene (Figs 4B, EV4A and B). We first explored by  
237 qPCR how strongly the dKO affected NMD (Fig 4C). For all three tested genes, the expression  
238 of the NMD-sensitive isoform was further increased compared to the previously used  
239 combination of UPF3B KO with additional UPF3A KD. Of note, the NMD inhibitory effect  
240 observed in the dKOs became more pronounced after UPF3B siRNA transfection, suggesting  
241 that low levels of residual UPF3B protein were still present in the dKO cells (Fig EV4C).

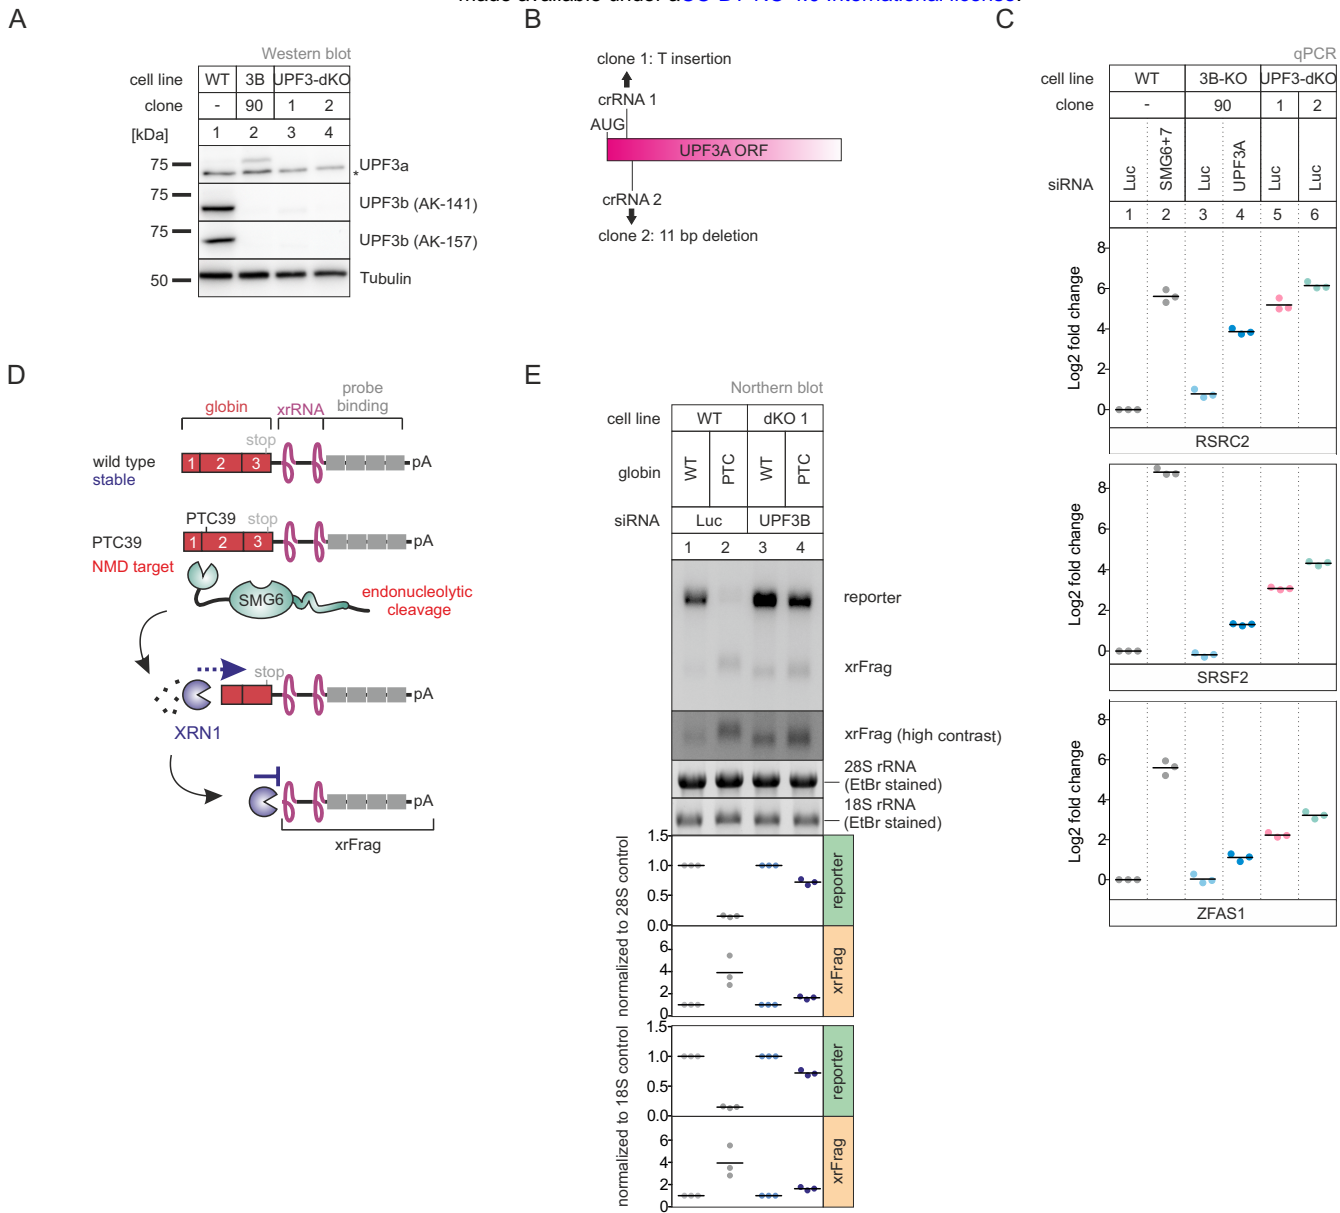

**Figure 4 - KO of both UPF3 paralogs results in strongly impaired NMD**

**A** Western blot analysis of WT, UPF3B KO and UPF3A-UPF3B doubleKO cells (clones 1 and 2). UPF3A and UPF3B protein levels were detected, Tubulin serves as control.

**B** Schematic depiction of the insertion/deletion in the UPF3A open reading frame resulting in the additional UPF3A KO in the UPF3B KO clone 90 generating UPF3 dKO clones.

**C** Quantitative RT-PCR of the indicated samples with the indicated KDs. For RSRC2 and SRSF2 the ratio of NMD isoform to canonical isoform was calculated. ZFAS1 expression was normalized to C1orf43 reference. Data points and means are plotted as Log2 fold change (n=3).

**D** Schematic overview of the globin reporter constructs and their functional elements.

**E** Northern blot analysis of globin reporter and xrFrag. Ethidium bromide stained 28S and 18S rRNAs are shown as controls. Quantification results are shown as data points and mean (n=3).

243 The expression levels of endogenous NMD substrates could be influenced by transcription  
244 rates or other indirect effects, which could lead to over- or underestimating NMD inhibition.  
245 Therefore, we investigated the NMD efficiency in the dKO cells using the well-established  $\beta$ -  
246 globin NMD reporter. To this end, we stably integrated  $\beta$ -globin WT or PTC39 constructs in  
247 WT and UPF3 dKO cells (Fig 4D). These reporters also contained XRN1-resistant sequences  
248 (xrRNAs) in their 3' UTRs, which allowed us to analyze not only the degradation of the full-  
249 length reporter mRNA but also to quantify decay intermediates (called xrFrag) (Boehm *et al.*,  
250 2016; Voigt *et al.*, 2019). The PTC39 mRNA was efficiently degraded and a strong xrFrag  
251 observed in WT cells, whereas in dKO cells the PTC39 reporter accumulated to high levels  
252 (72% compared to the WT mRNA), which was accompanied by a decrease in the amount of  
253 xrFrag. (Fig 4E, lane 2 vs. lane 4). In line with the previous observations, this result indicated  
254 a strong decrease of NMD activity upon the KO of both UPF3 paralogs using a robust NMD  
255 reporter pair expressed independently of endogenous NMD substrates, supporting the  
256 functional redundancy of UPF3A and UPF3B in NMD.

257 To establish transcriptome-wide insights into UPF3A and UPF3B function, we carried out RNA-  
258 seq for both dKO clones, which was combined with and without UPF3B KD treatment to  
259 eliminate as many of the potentially present remaining UPF3B proteins (Fig EV5A and  
260 Datasets EV1-EV3). Differential gene expression analysis showed that nearly three times as  
261 many genes were upregulated than downregulated in both dKO cells (Figs 5A and EV5B). This  
262 is consistent with the redundant role of UPF3B and UPF3A as supporting NMD factors. The  
263 considerable overlap between both clones also suggests that we identified high-confidence  
264 UPF3 targets. Furthermore, 890 of these gene were also significantly upregulated in previously  
265 generated SMG7 KO plus SMG6 KD data (Fig EV5C, ref data: (Boehm *et al.*, 2021)) indicating  
266 that these are universal NMD-targets and not specific to a certain branch of the NMD pathway.  
267 In addition to DGE, subsets of the expressed genes showed changes in alternative splicing  
268 or/and differential transcript usage (Fig 5B). In total, 14-16 % of the global transcriptome  
269 showed single or combined changes (DGE, DTU and/or AS) and up to 20% when the cells  
270 were treated with an additional UPF3B KD.



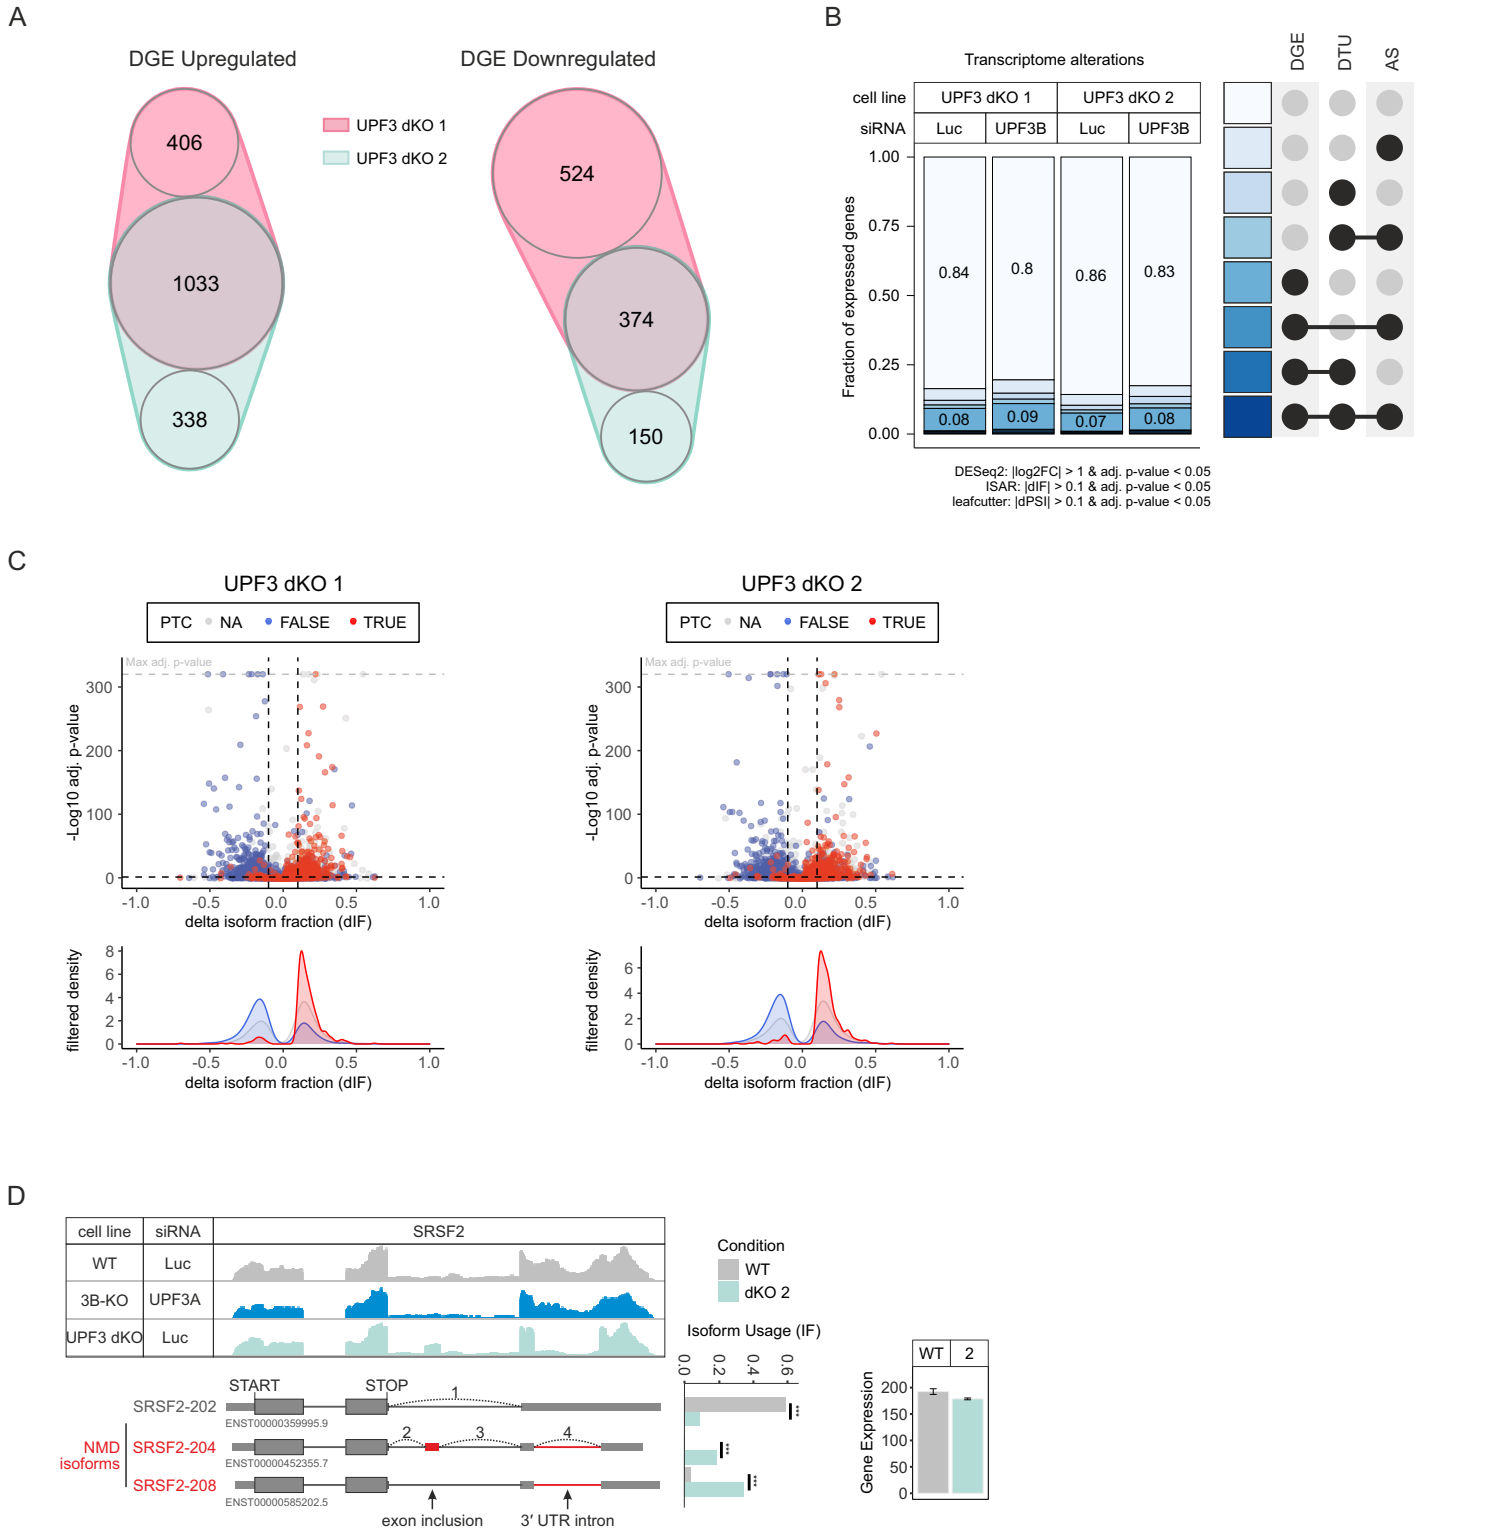

**Figure 5 - RNA-seq reveals strong global upregulation of NMD-sensitive targets upon UPF3 dKO in HEK293 cells**

**A** nVenn Diagram showing the overlap of up- or downregulated genes in the UPF3 dKO cell lines 1 and 2. Log<sub>2</sub> fold change <-1 (downregulated) or >1 (upregulated) and adjusted p-value (padj) < 0.05. DGE = Differential Gene Expression.

**B** Fraction of expressed genes (genes with non-zero counts in DESeq2) were calculated which exhibit individual or combinations of differential gene expression (DGE), differential transcript usage (DTU) and/or alternative splicing (AS) events in the indicated conditions using the respective computational analysis (cutoffs are indicated). AS and DTU events were collapsed on the gene level. For DGE, p-values were calculated by DESeq2 using a two-sided Wald test and corrected for multiple testing using the Benjamini-Hochberg method. For DTU, p-values were calculated by IsoformSwitchAnalyzerR using a DEXSeq-based test and corrected for multiple testing using the Benjamini-Hochberg method. For AS, p-values were calculated by LeafCutter using an asymptotic Chi-squared distribution and corrected for multiple testing using the Benjamini-Hochberg method.

**C** Volcano plots showing the differential transcript usage (via IsoformSwitchAnalyzerR) in various RNA-Seq data. Isoforms containing GENCODE (release 33) annotated PTC (red, TRUE), regular stop codons (blue, FALSE) or having no annotated open reading frame (grey, NA) are indicated. The change in isoform fraction (dIF) is plotted against the -log<sub>10</sub> adjusted p-value (adj.p-value). Density plots show the distribution of filtered isoforms in respect to the dIF, cutoffs were  $|dIF| > 0.1$  and adj.p-value < 0.05. P-values were calculated by IsoformSwitchAnalyzerR using a DEXSeq-based test and corrected for multiple testing using the Benjamini-Hochberg method.

**D** Read coverage of SRSF2 from the indicated RNA-seq sample data with or without UPF3A siRNA treatment shown as Integrative Genomics Viewer (IGV) snapshot. The canonical and NMD-sensitive isoforms are schematically indicated below. Quantification of isoforms by IsoformSwitchAnalyzerR (right).



272 In agreement with NMD inhibition in the dKOs, we saw that many transcripts containing a PTC  
273 were up-regulated, while the corresponding transcripts without a PTC were down-regulated.  
274 (Figs 5C and EV5D). Under these conditions, the IGV snapshot of the NMD-target SRSF2  
275 showed NMD-inducing exon inclusion and 3' UTR splicing events, which were not visible in  
276 combined UPF3B KO/UPF3A KD cells (Fig 5D). Collectively, the RNA-seq data support the  
277 previously observed strong NMD inhibition in response to the complete absence of both UPF3  
278 paralogs and hence their proposed redundancy.

### 279 **UPF3A supports NMD independent of a bridge function**

280 Next, we aimed to analyze whether the severe effects in the dKOs are at least partly due to  
281 the loss of a protein-protein interaction bridge between UPF2 and the EJC, while the presence  
282 of UPF3A in the UPF3B KOs preserved this function ensuring NMD functionality. Therefore,  
283 we expressed FLAG-tagged UPF2 in WT, UPF3B KO and UPF3A-UPF3B dKO cells and  
284 analyzed the UPF2 interactome using mass spectrometry (Dataset EV4). Consistent with the  
285 previously described interaction partners, we found many NMD factors as well as EJC proteins  
286 in the UPF2 interactome in WT cells (Fig 6A). Contrary to our expectation, the three EJC core  
287 components (EIF4A3, RBM8A, MAGOHB) barely co-precipitated with UPF2 in the absence of  
288 UPF3B (compared to control: log<sub>2</sub> FC = 0.58, 0.63 and 0.74, respectively; Fig 6B) and were  
289 therefore strongly decreased in comparison to the WT cells (Fig EV6A). Hence, the UPF2-  
290 bound UPF3A was unable to establish a stable interaction with the EJC. Surprisingly, in the  
291 UPF3B KO cells the EJC-associated CASC3 still showed relatively high levels of co-  
292 precipitation (log<sub>2</sub> FC = 4.42), which therefore appears to be independent of the interaction  
293 with the other EJC components. In the dKOs all interactions with EJC proteins including  
294 CASC3 were completely lost (Figs 6C and EV6B). The latter was also observed in a  
295 comparable approach employing stable isotope labeling with amino acids in cell culture  
296 (SILAC) to analyze the UPF2 interactome in the WT and dKO cells (Dataset EV5). All EJC  
297 core components that were highly co-precipitated in WT cells were lost in the absence of both  
298 UPF3 paralogs (Figs EV6C-E).

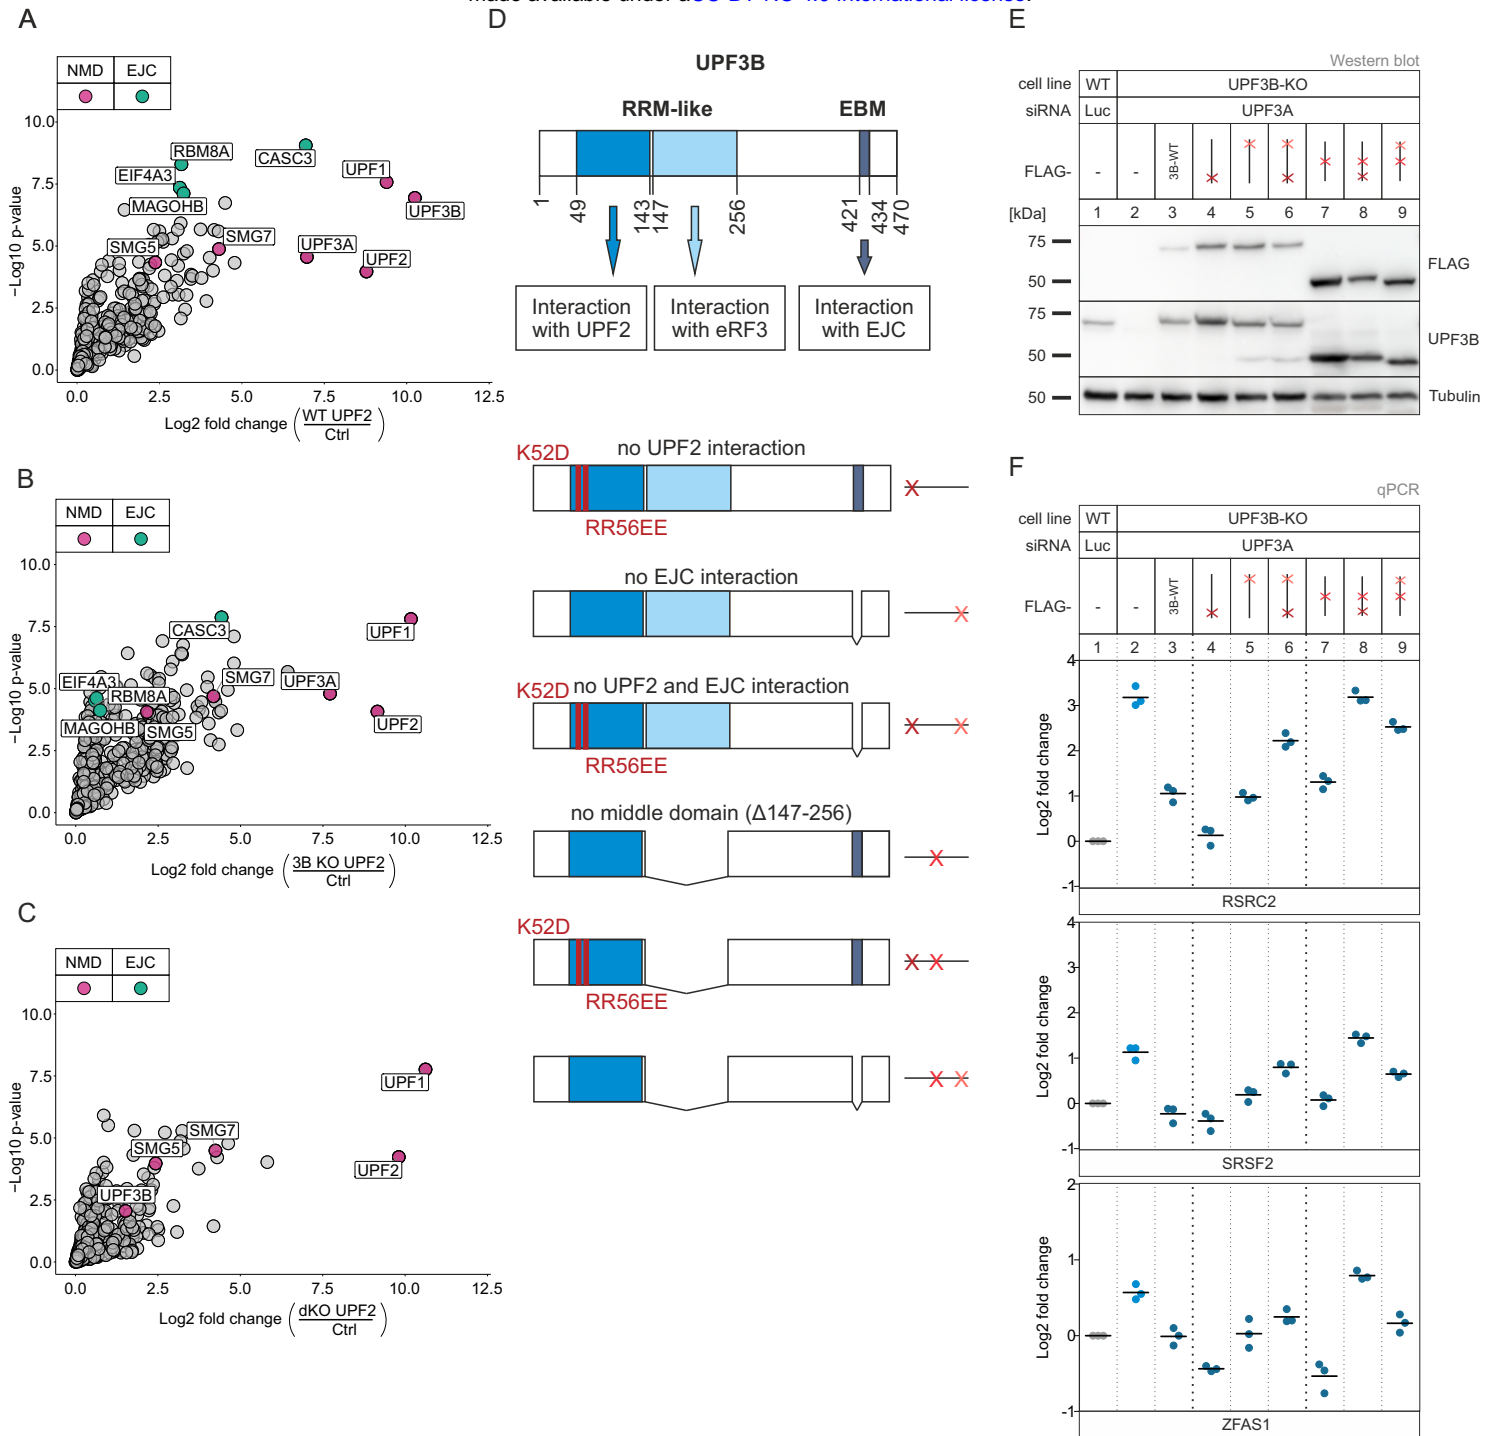

**Figure 6 - Interaction of UPF3A and UPF3B with the EJC is dispensable to elicit NMD**

**A-C** Volcano plots of label free mass spectrometry-based analysis of the interaction partners of UPF2 in WT cells treated with control siRNAs and the UPF3B KO clone 90 and dKO clone 1 both treated with siRNAs targeting UPF3B (n = 4 biologically independent samples). (A) FLAG-UPF2 in WT against FLAG-GST control in WT cells, (B) UPF2 in 3B KO cells against FLAG control in WT cells, (C) UPF2 in dKO cells against FLAG control in WT cells. Points labeled in purple indicate NMD factors; points labeled in turquoise indicate EJC components. Cut offs: Log<sub>2</sub> fold change ≥ 0

**D** Schematic representation of the UPF3B protein domains and the respective functions. Below are the mutated rescue constructs and their respective abstract placeholders.

**E** Western blot analysis of WT and UPF3B KO clone 90 with Luciferase and UPF3AKDs respectively. Monitored expression of the FLAG-tagged UPF3B rescue construct shown in (D). Rescue construct protein levels were detected with anti-FLAG and anti-UPF3B (AK-141) antibodies. Tubulin serves as control.

**F** Quantitative RT-PCR of the samples from (E). For RSRC2 and SRSF2 the ratio of NMD isoform to canonical isoform was calculated. ZFAS1 expression was normalized to C1orf43 reference. Data points and means are plotted as log<sub>2</sub> fold change (n=3).

## 300 **Partially redundant functions of UPF3B domains are required for NMD**

301 With regard to the surprising observation that UPF3A apparently elicits NMD without  
302 interacting with the EJC, we aimed to investigate the molecular features required by UPF3 to  
303 support NMD via rescue experiments. In principle, the UPF3 dKO cells represent an ideal  
304 system for this approach. However, apart from the residual amounts of UPF3B that were still  
305 expressed, we noticed that the UPF3 dKOs were able to upregulate the expression of a  
306 shortened UPF3B variant after long-term cultivation.

307 Since this phenomenon did not occur in the single UPF3B KOs, we generated stable UPF3B  
308 KO cell lines expressing various inducible UPF3B constructs with individual or combined  
309 binding site mutations (Figs 6D and E and EV6F). Transfection of these cells with UPF3A  
310 siRNAs resulted in the robust depletion of UPF3 for the analysis of the rescue activities of  
311 individual UPF3B variants. Considering the established role of UPF3B as a bridge between  
312 UPF2 and the EJC, which we validated in the mass spec analysis, it was surprising to see that  
313 disruption of either of these interactions did not affect UPF3B's rescue capacity (Fig 6F, lane  
314 3 vs. lanes 4 and 5). This is partially consistent with the observed functional NMD in UPF3B  
315 KOs, despite the apparent inability of UPF3A to form a bridge between UPF2 and the EJC  
316 (Figs 3C and 6B). However, mutating both UPF3B binding sites (disrupting UPF2 and EJC  
317 binding) largely inactivated the NMD-related function of UPF3B.

318 It was recently reported that EJC-bound or free UPF3B can interact with the eukaryotic release  
319 factor 3 (eRF3) via the so far uncharacterized middle domain (aa 147-256) (Neu-Yilik *et al.*,  
320 2017). With this interaction and binding of the terminating ribosome, UPF3B can delay  
321 translation termination, which defines aberrant termination events and triggers NMD (Amrani  
322 *et al.*, 2004; Neu-Yilik *et al.*, 2017; Peixeiro *et al.*, 2012). To investigate the impact of this  
323 interaction on NMD, we created UPF3B variants lacking that specific middle domain or  
324 combined the deletion with the previously used interaction mutations (Fig 6D and E). We  
325 observed a similar pattern as the UPF3B mutants examined in the previous experiment: when  
326 only the middle domain was deleted, UPF3B was able to rescue NMD comparable to the WT

327 protein (Fig 6F lane 7). In combination with a mutation in the UPF2- or the EJC binding site its  
328 function in NMD was severely impaired (lanes 8 and 9). This suggests that if the classic bridge  
329 formation is inhibited by removing either of the interaction sites, UPF3B relied on the function  
330 carried out by the uncharacterized middle domain.

331 As further support for the NMD promoting effect of UPF3A on NMD, we performed a rescue  
332 experiment in the above used UPF3B KO UPF3A KD cells (Figs 7A and B). Expression of the  
333 siRNA insensitive UPF3A construct did not only restore NMD functionality, it was even more  
334 efficient than the UPF3B construct (Fig 7C lane 3 vs. lane 5), underlining our previous  
335 statement: UPF3A supports and elicits NMD comparably to its paralog UPF3B.

336 Also comparable to UPF3B, UPF3A has a second naturally occurring isoform but instead of  
337 skipping exon 8 (like UPF3B) it excludes its fourth exon. This isoform is transcribed in  
338 approximately one third of the cases (Fig EV6G) in WT HEK 293 cells but cannot be detected  
339 on protein levels. We were interested, whether this isoform was as potent to elicit NMD as the  
340 full-length construct. Expression of the exon 4 UPF3A deletion construct in the UPF3 depleted  
341 cells showed no rescue (Fig 7C lane 4). Hence, exon 4 must encode for an essential region  
342 required for the bridge-independent function of UPF3A.

343 In view of these observations and the close proximity of exon 4 (124-157) to the middle domain  
344 (147-256), we decided to investigate which effect the deletion of the homologous exon 4 in the  
345 paralog UPF3B has. The UPF3B  $\Delta e4$  construct behaved like the corresponding UPF3A  
346 construct and showed no NMD rescue activity (lane 6). However, the expression of the N-  
347 terminus of UPF3B was able to restore NMD comparably to the WT protein (lane 7). This is  
348 consistent with all our previous findings, since the first 279 amino acids contain the UPF2  
349 binding site as well as the middle domain, which was shown to be sufficient to elicit NMD (Fig  
350 6F lane 5). Due to the fact that the C-terminus contains only one interaction site and lacks exon  
351 4, its incapability to rescue NMD is in line with our previous experiments. Overall, our results  
352 identify exon 4 of UPF3 as a previously unnoticed region that is essential for its function in  
353 NMD.

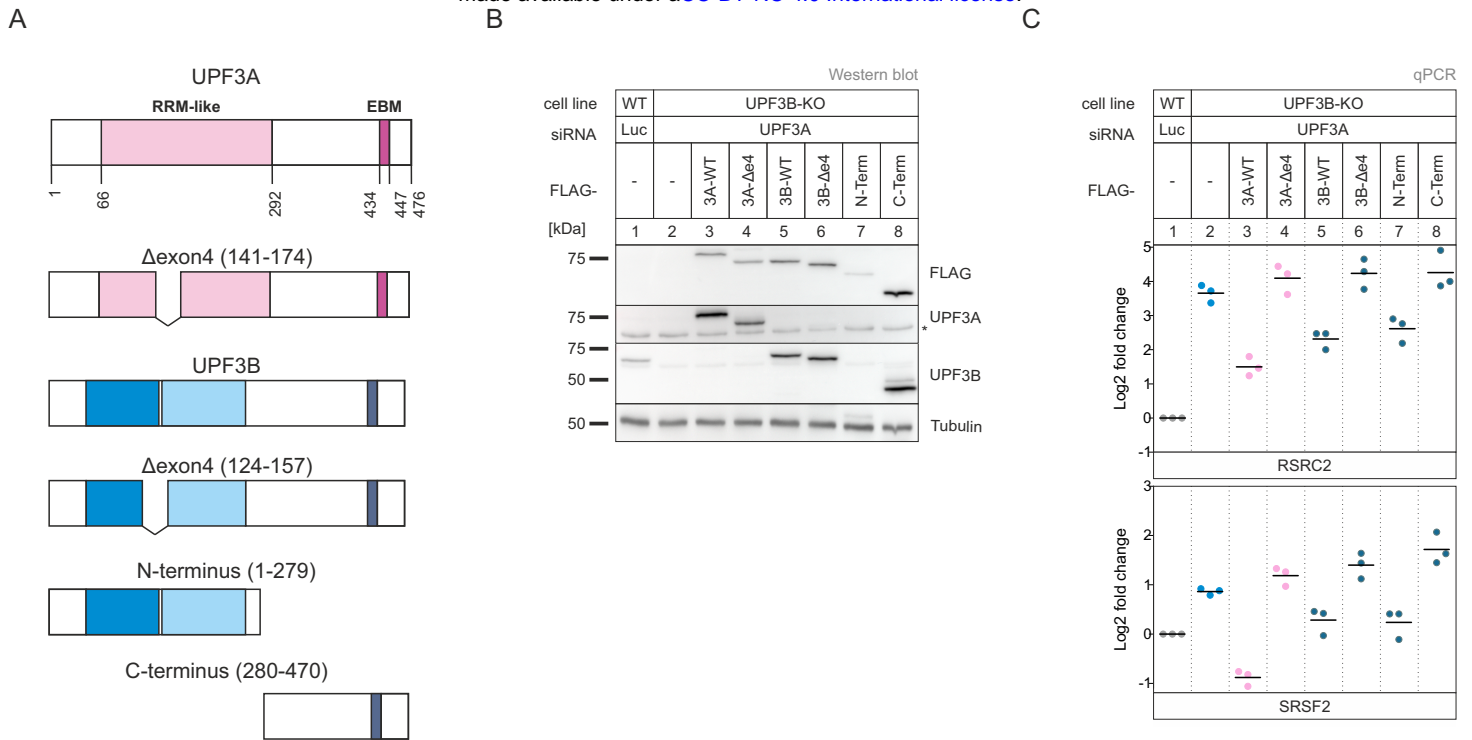

**Figure 7 - WT UPF3A can rescue NMD in full extent. Deletion on exon 4 disrupts functionality in both paralogs.**

**A** Schematic representation of the UPF3A and UPF3B protein domains. Below are the respective mutated rescue constructs.

**B** Western blot analysis of WT and UPF3B KO clone 90 with Luciferase and UPF3A KDs respectively. Monitored expression of the FLAG-tagged UPF3A and UPF3B rescue construct shown in (A). Rescue construct protein levels were detected with anti-FLAG, anti-UPF3A and anti-UPF3B (AK-141) antibodies. Tubulin serves as control.

**C** Quantitative RT-PCR of the samples from (B). For RSR2 and SRSF2 the ratio of NMD isoform to canonical isoform was calculated. Data points and means are plotted as log<sub>2</sub> fold change (n=3).

## 355 **Discussion**

356 Methodological advances - be it improved analytics or novel experimental approaches - can  
357 help to find new answers to old biological problems. Equipped with powerful new molecular  
358 biology methods, we set out to answer the question which functions the two UPF3 paralogs  
359 carry out in human cells. Since the initial description of mammalian UPF3A and UPF3B (Lykke-  
360 Andersen *et al.*, 2000; Serin *et al.*, 2001), many researchers have been engaged in determining  
361 the function and work distribution of these two proteins in NMD. It became clear relatively early  
362 that UPF3A and UPF3B can both interact with UPF2 as well as the EJC and activate NMD  
363 (Gehring *et al.*, 2003; Kim *et al.*, 2001; Lykke-Andersen *et al.*, 2000; Serin *et al.*, 2001). But  
364 significant differences in these interactions and the amounts of UPF3A and UPF3B proteins  
365 were also found, leading to the hypothesis that UPF3B is the central player and UPF3A more  
366 its backup (Chan *et al.*, 2009; Kunz *et al.*, 2006). The investigations were further intensified  
367 upon the discovery that mutations in the human UPF3B gene lead to various forms of mental  
368 disorder (Nguyen *et al.*, 2014). Disease severity seems to be dictated by the amount of UPF3A  
369 present, suggesting again a compensatory mechanism and redundant functions of UPF3B and  
370 UPF3A (Nguyen *et al.*, 2012).

371 Later, it was reported that in mouse cells UPF3B is an NMD activator and UPF3A is an NMD  
372 inhibitor (Shum *et al.*, 2016). Accordingly, removal of UPF3A resulted in enhanced NMD,  
373 whereas removal of UPF3B inhibited NMD. Recently, another function of UPF3B was  
374 discovered, namely that it is involved in different phases of translation termination (Neu-Yilik  
375 *et al.*, 2017). UPF3B not only interacts with release factors, but also slows down translation  
376 termination and promotes dissociation of post-termination ribosomal complexes. Whether  
377 these functions of UPF3B in translation termination are related to its function in NMD has not  
378 been clarified to date.

379 Although our results cannot fully answer this last question, we have more or less definite  
380 answers for the functions of the two proteins UPF3A and UPF3B in NMD. All our data support  
381 the notion that the presence of UPF3B or UPF3A is sufficient to maintain NMD activity in

382 human cells. First, we see at most a weak inhibition of NMD in our HEK 293 UPF3B KO cells.  
383 However, this does not necessarily mean that all cell types display full NMD activity after a KO  
384 of UPF3B. Instead, it is conceivable that HEK 293 cells are just particularly robust against the  
385 UPF3B depletion or particularly efficient at the compensatory upregulation of UPF3A. Likewise,  
386 we see no NMD inhibition in cells overexpressing UPF3A or NMD “boosting” in UPF3A KO  
387 cells. Only when we deplete in UPF3A or UPF3B KO cell lines the respective other protein by  
388 RNAi or genomic KO, NMD efficiency substantially decreases. It should be noted that the  
389 effects of a KO on NMD activity are typically stronger than those of a KD, which is consistent  
390 with our earlier observations (Boehm *et al.*, 2021; Gerbracht *et al.*, 2020). Although our data  
391 clearly argue against an NMD-inhibitory function of UPF3A, experimental differences exist  
392 between our work and the work describing the NMD inhibition by UPF3A. While we have used  
393 human HEK293 cells, the results of Shum *et al.* were obtained in P19 mouse cells and mouse  
394 embryonic fibroblasts (MEFs). Both, the different organisms and the different types of cells  
395 could have influenced the results. Interestingly, in a parallel manuscript, Yi *et al.* find that  
396 mouse UPF3A can rescue NMD in human HCT116 UPF3A-UPF3B dKO cells (Yi *et al.*, 2021).  
397 Although these results were obtained in a heterologous context, mouse UPF3A does not  
398 appear to be a general NMD inhibitor.

399 The different KO cells that we have generated in the course of this project enabled us to  
400 conduct experiments that went beyond investigating UPF3-dependent NMD substrates in  
401 human cells. Specifically, we were able to study the composition of NMD complexes without  
402 UPF3B or both UPF3 proteins and to carry out rescue experiments with different UPF3A and  
403 UPF3B protein variants. Not entirely unexpected, we observed that in the absence of UPF3A  
404 and UPF3B, the interaction between UPF2 and the EJC is lost. This bridging by UPF3 between  
405 UPF2-containing NMD complexes and the EJC was previously considered to be essential for  
406 NMD. However, two observations argue against UPF3 being mainly a bridging protein. First,  
407 UPF3B mutants that cannot interact with either the EJC or UPF2 fully rescue NMD. Only when  
408 both interaction sites were mutated, UPF3 lost its NMD function. This indicates that the  
409 interaction with one of the two interaction partners is sufficient to maintain NMD. Second, we



410 observed that not only in UPF3 double-KO cells, but also in UPF3B KO cells, the bridge  
411 between UPF2 and the EJC was lost. Although quite surprising at first glance, this is in good  
412 agreement with previous results showing that the interaction between the EJC and UPF3A is  
413 substantially weaker than that between the EJC and UPF3B (Kunz *et al.*, 2006). Indeed, earlier  
414 structural data also argue against a bridging function of UPF3. In the cryo-EM structure of an  
415 EJC-UPF3-UPF2-UPF1 complex, UPF1 did not face towards a possible terminating ribosome  
416 in the 5' direction, but instead in 3' direction (Melero *et al.*, 2012). Therefore, one could  
417 conclude that the interactions between all these proteins do not take place at a single time  
418 point during NMD.

419 This raises the question of what UPF3 function is essential for NMD, if it is not its bridging  
420 function? Our rescue experiments showed that the middle domain of UPF3B cooperates with  
421 the UPF2- and the EJC interaction sites, i.e., its deletion in combination with one other mutation  
422 inactivates UPF3B. The middle domain has been described to mediate the interaction of  
423 UPF3B with release factor 3 (RF3), but this interaction has not been demonstrated for UPF3A  
424 (Neu-Yilik *et al.*, 2017). So, if UPF3A cannot interact with RF3 and also binds weaker to the  
425 EJC as noted above, it should be functionally inactive. However, we see no obvious difference  
426 between UPF3B and UPF3A in the rescue experiments. These and other observations can, in  
427 our view, only be explained with more complex models, which must also consider non-linear  
428 relationships and potential auxiliary functions of certain regions of UPF3 (Fig 8).

429 Since the interactions of UPF3 are essential only in combination with each other, we propose  
430 that UPF3A and UPF3B exert multiple functions at different time points of NMD and in  
431 association with different complexes. We only consider here the previously described  
432 interactions of UPF3 with UPF2, the EJC and the release factor 3 (Fig 8B). While it was  
433 previously described that UPF3B interacts better than UPF3A with UPF2 (Chan *et al.*, 2009),  
434 we find both proteins in the FLAG-UPF2 IP. The amount of UPF3A does not seem to increase  
435 when UPF3B is depleted, which could be due to the overexpression of UPF2 in our  
436 experimental system. The interaction of UPF3 and UPF2 is also conserved in yeast and is thus



A

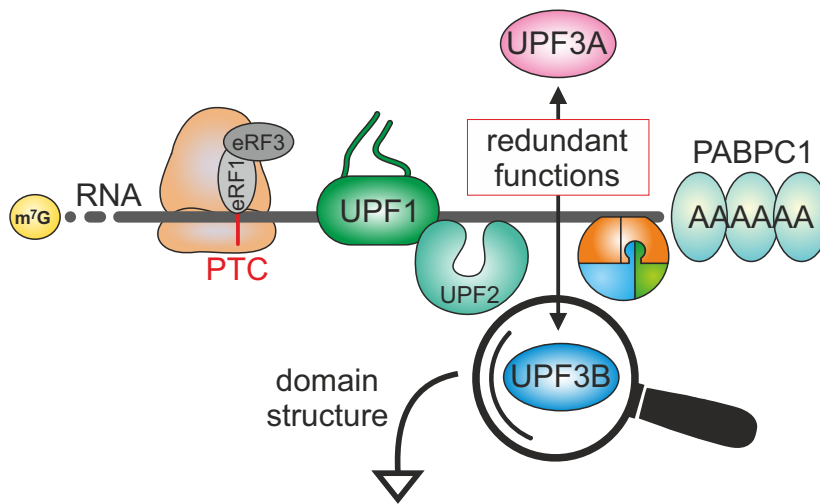

B

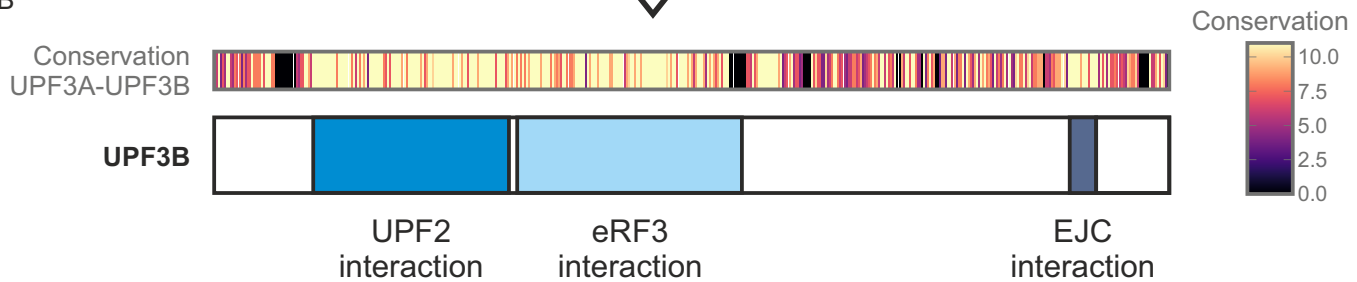

C

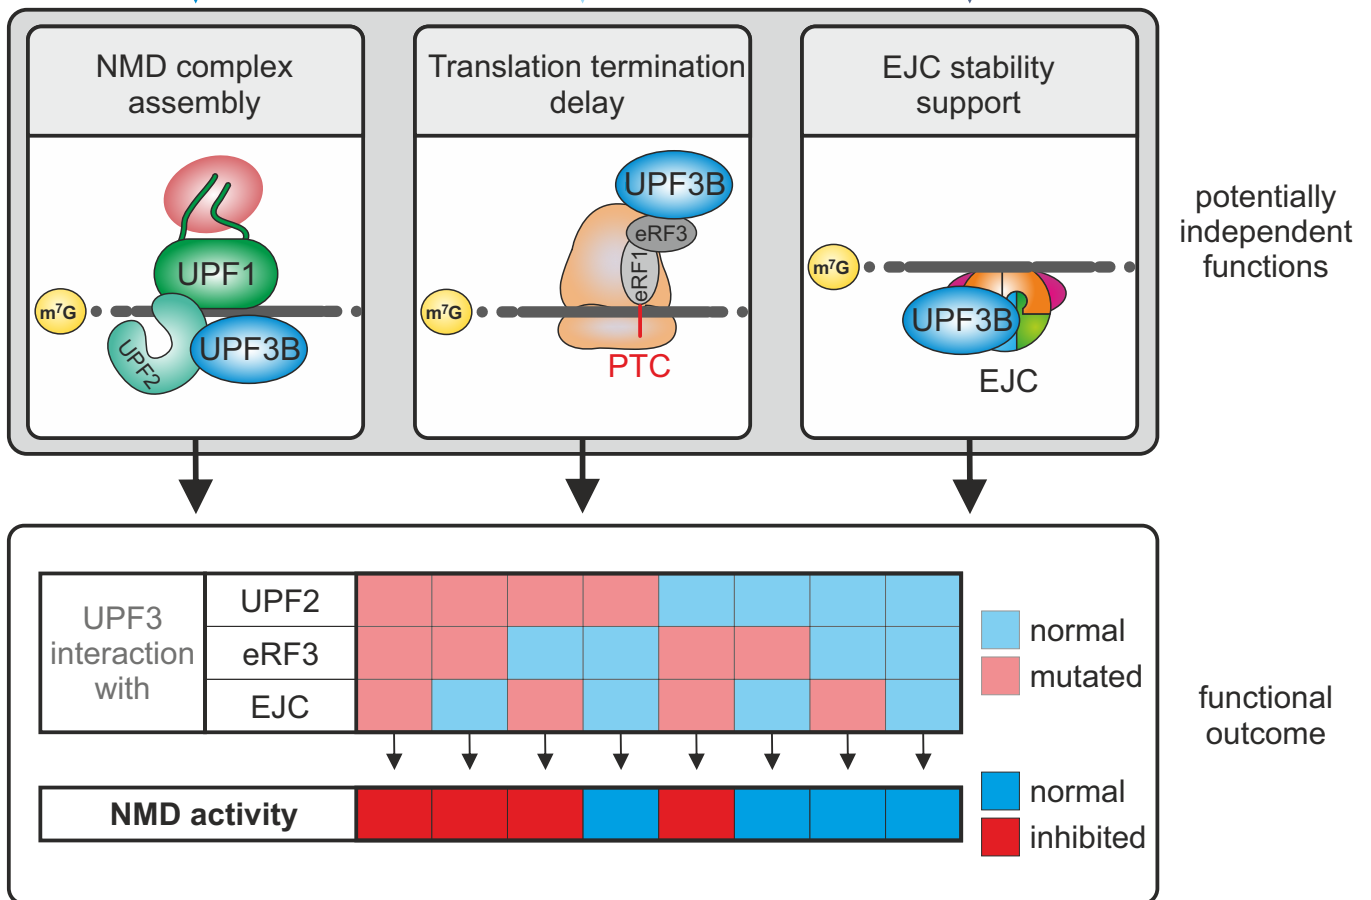

**Figure 8 - Model for potentially independent functions of UPF3 in NMD.**

**A** Both UPF3 paralogs UPF3A and UPF3B can elicit NMD and trigger mRNA degradation. We propose a new model where UPF3B exerts multiple functions at different timepoints during NMD.  
**B** Schematic overview of UPF3B domain structure and the postulated functions. Conservation between UPF3A (UniProt ID: Q9H1J1-1) and UPF3B (UniProt ID: Q9BZ17-2) proteins as calculated via Clustal Omega and Jalview is shown.  
**C** Via the RRM-like domain in the N-terminus of the protein it interacts with UPF2, which might be important for the assembly of an NMD-inducing complex. The middle domain was ascribed to be responsible for the interaction with eRF3 and potential translation termination delay. The interaction with the EJC via the EBM could stabilize the complex by preventing its interaction with the disassembly factor PYM1. Only if two out of the three functions are ensured, NMD can pursue and degrade the targeted mRNA.

438 likely to have functional significance. However, a UPF3B mutant in which binding to UPF2 was  
439 inactivated rescues NMD better than the UPF3B WT.

440 The interaction of the middle domain of UPF3B with RF3 has only recently been described  
441 (Neu-Yilik *et al.*, 2017). Again, we find that removing only the middle domain does not  
442 substantially inhibit NMD. In combination with an inactivation of the UPF2 binding, the deletion  
443 of the middle domain leads to a complete inhibition of the NMD in the rescue assay. This could  
444 also happen when exon 4 of UPF3B or UPF3A is removed, which is located at the junction  
445 between the UPF2 binding domain and the middle domain. Therefore, UPF3A  $\Delta$ exon4 would  
446 be a naturally occurring, NMD-inactive variant of the UPF3 proteins.

447 How might the different regions and domains communicate with each other and regulate the  
448 function of UPF3 in NMD? The function of the middle domain in relation to NMD has not yet  
449 been investigated. It is conceivable that UPF3B plays a minor role in translation termination  
450 and that the events that trigger NMD can also occur without the middle domain - potentially  
451 with a delay (Figure 8c). Therefore, the deletion of the middle domain could be tolerated in  
452 isolation but would become fatal in combination with other mutations that impair additional  
453 functions. With regard to the EBM, we propose that its binding stabilizes the EJC, for example  
454 by preventing the interaction of the EJC with PYM1 (Fig 8C). PYM1 is a known EJC  
455 disassembly factor and binds to the EJC at a surface area that overlaps with the EBM binding  
456 site (Bono *et al.*, 2004; Buchwald *et al.*, 2010; Gehring *et al.*, 2009). We suggest that in cells  
457 rescued with the  $\Delta$ EBM mutant EJCs are more readily dissociated from the mRNA in the  
458 cytoplasm. The concomitant loss of UPF3B's termination function ( $\Delta$ middle domain,  $\Delta$ EBM)  
459 would have a dramatic effect on NMD efficiency, because NMD would be initiated too slowly.  
460 Likewise, the interaction of UPF3 with UPF2 might be important for the assembly of an NMD-  
461 inducing complex (Fig 8C) that needs to be timed with translation termination and that leads  
462 to NMD activation only in the presence of the EJC. Although these suggestions may not  
463 accurately reflect the molecular events during NMD, they illustrate possible functions of the  
464 domains of UPF3, particularly in relation to their NMD-inactive combinations (Fig 8). Overall,

465 our observations fit well with a "synthetic lethal" model in which inactivation of any two domains  
466 together disrupts UPF3 activity.

467 One factor whose function needs to be examined in more detail in the context of UPF3 is  
468 CASC3. Our mass spectrometry analysis shows that CASC3 immunoprecipitates very well  
469 with UPF2 in wildtype cells. CASC3 still partially precipitates with UPF2 in UPF3B KO cells,  
470 although the interaction of the other EJC factors is reduced to background levels. In previous  
471 work, we observed that UPF3B interacts less well with the EJC when CASC3 is knocked out  
472 (Gerbracht *et al.*, 2020). This indicates that an interaction between CASC3 and the UPF3  
473 proteins exists that is not well understood so far. What kind of interaction this is and what  
474 function it has will be interesting to address in future experiments.

475 Our own work and the work of Yi *et al.* have re-examined the functions of the human UPF3  
476 paralogues UPF3A and UPF3B (Yi *et al.*, 2021). Together, the studies confirmed some  
477 previous findings and disconfirmed others, thereby successfully (re-)defining the role of UPF3  
478 proteins in human cells. A few questions remain unanswered and need to be addressed in the  
479 future, for example how exactly the middle domain supports NMD. As described above, our  
480 results have implications for the understanding of the NMD mechanism, as they are  
481 incompatible with, and thus exclude, certain models of NMD. In addition, they may also help  
482 to better understand the link between UPF3B and intellectual disability and which domains of  
483 UPF3A modulate the severity of the disease and may therefore be potential targets for therapy.

484

485

## 486 **Materials and Methods**

### 487 **Cell Culture**

488 Flp-In-T-REx-293 (human, female, embryonic kidney, epithelial; Thermo Fisher Scientific,  
489 RRID:CVCL\_U427) cells were cultured in high-glucose, GlutaMAX DMEM (Gibco)  
490 supplemented with 9% fetal bovine serum (Gibco) and 1x Penicillin Streptomycin (Gibco). The  
491 cells were cultivated at 37°C and 5% CO<sub>2</sub> in a humidified incubator. The generation of  
492 knockout and stable cell lines is described below and all cell lines are summarized in [Dataset](#)  
493 [EV6](#).

### 494 **siRNA-mediated knockdowns**

495 For reverse transfection the cells were seeded at a density of 2.5x10<sup>5</sup> cells per well. The  
496 transfection solution contained 2.5 µl Lipofectamine RNAiMAX and 60 pmol of the respective  
497 siRNAs. For the UPF3A and UPF3B knockdowns 30 pmol of both belonging siRNAs were  
498 used. In preparation for mass spectrometry, 2.5x10<sup>6</sup> were reverse transfected in 10 cm plates  
499 using 6.25 µl Lipofectamine RNAiMAX and 150-200 pmol siRNA (or half of it for each of the  
500 two siRNAs for UPF3A or UPF3B). All siRNAs used in this study are listed in [Dataset EV6](#).

### 501 **Plasmid transfection**

502 For each stable transfection 2.5-3.0x10<sup>5</sup> cells were seeded one day prior transfection in 6-  
503 wells. To express the N-terminally FLAG-tagged protein constructs and reporter mRNAs for  
504 northern blotting, they were stably integrated using the PiggyBac (PB) Transposon system with  
505 the cumate-inducible PB-CuO-MCS-BGH-EF1-CymR-Puro vector. This vector was modified  
506 from the original vector (PB-CuO-MCS-IRES-GFP-EF1 $\alpha$ -CymR-Puro (System Biosciences))  
507 by replacing the IRES-GFP cassette with a BGH polyA signal. Per well 1.0 µg of the respective  
508 PB vector and 0.8 µg PB Transposase were transfected using a calcium phosphate-based  
509 system with BES buffered saline (BBS). Additionally, 0.5 µg of pCI-maxGFP was transfected  
510 as a visual feedback for transfection efficiency. 48 h later, the cells were pooled in 10 cm plates  
511 and selected for positive cells by incubation in media containing 2 µg/ml puromycin for a week.

512 To induce expression of the constructs, 30 µg/ml cumate was added and the cells were  
513 harvested after 72h for continuing experiments.

514 The mRNA reporter constructs β-globin WT and β-globin PTC are available on Addgene (IDs  
515 108375-108376). All vectors used in this study are listed in [Dataset EV6](#).

## 516 **Generation of knockout cells using CRISPR-Cas9**

517 The knockouts were performed using the Alt-R CRISPR-Cas9 system (Integrated DNA  
518 Technologies) and reverse transfection of a Cas9:guideRNA ribonucleoprotein complex using  
519 Lipofectamine RNAiMAX (Thermo Fisher Scientific) according to the manufacturer's protocol.  
520 The crRNA sequence (Integrated DNA Technologies) to target UPF3B was  
521 /AltR1/rArGrArUrArArGrCrArGrGrArUrCrGrCrArArCrArGrUrUrUrUrArGrArGrCrUrArUrGrCrU/  
522 AltR2/. For UPF3A the crRNA sequences were /AltR1/rCrCrGrCrArArCrCrGrGrArGrGrArC  
523 rGrArArGrUrGrUrUrUrUrArGrArGrCrUrArUrGrCrU/AltR2/ for clone 1 and /AltR1/rGrCrGrGr  
524 UrGrGrArArCrUrGrCrArCrUrUrCrUrArGrUrUrUrUrArGrArGrCrUrArUrGrCrU/AltR2/ for clone  
525 2. Reverse transfection was performed on  $1.5 \times 10^5$  cells per crRNA in 12-well plates. 48 h after  
526 transfection the cells were trypsinized, counted and seeded at a mean density of a single cell  
527 per well in 96-well plates. Cell colonies originating from a single clone were then screened via  
528 Western blot and genome editing of UPF3A and UPF3B was analyzed on the genomic level  
529 via DNA extraction and Sanger sequencing. Alterations on the transcript level were analyzed  
530 via RNA extraction followed by reverse transcription and Sanger sequencing.

## 531 **DNA and RNA extraction**

532 Genomic DNA extraction using QuickExtract DNA Extraction Solution (Lucigen) was  
533 performed according to manufacturer's instruction. For RNA extraction cells were harvested  
534 with 1 ml RNAsolv reagent (Omega Bio-Tek) per 6 well and RNA was isolated according to  
535 manufacturer's instruction, with the following changes: instead of 200 µl chloroform, 150 µl 1-  
536 Bromo-3-chloropropane (Sigma-Aldrich) was added to the RNAsolv. Additionally, in the last  
537 step the RNA pellet was dissolved in 20 µl RNase-free water by incubating for 10 min on a  
538 shaking 65 °C heat block.

## 539 **Western blotting**

540 SDS-polyacrylamide gel electrophoresis and immunoblot analysis were performed using  
541 protein samples harvested with RIPA buffer (50 mM Tris/HCl pH 8.0, 0.1% SDS, 150 mM NaCl,  
542 1% IGEPAL, 0.5% deoxycholate) or samples eluted from Anti-FLAG M2 magnetic beads. For  
543 protein quantification, the Pierce Detergent Compatible Bradford Assay Reagent (Thermo  
544 Fisher Scientific) was used. All antibodies used in this study are listed in [Dataset EV6](#).  
545 Detection was performed with Western Lightning Plus-ECL (PerkinElmer) or ECL Select  
546 Western Blotting Detection Reagent (Amersham) and the Vilber Fusion FX6 Edge imaging  
547 system (Vilber Lourmat).

## 548 **Semi-quantitative and quantitative reverse transcriptase (RT)-PCR**

549 Reverse transcription was performed with 1-4  $\mu\text{g}$  of total RNA in a 20  $\mu\text{l}$  reaction volume with  
550 10  $\mu\text{M}$  VNN-(dT)<sub>20</sub> primer and the GoScript Reverse Transcriptase (Promega). For the semi-  
551 quantitative end-point PCRs the MyTaq Red Mix (Bioline) was used. Quantitative RT-PCRs  
552 were performed with the GoTaq qPCR Master Mix (Promega), 2% of cDNA per reaction, and  
553 the CFX96 Touch Real-Time PCR Detection System (Bio-Rad). Each biological replicate was  
554 repeated in technical triplicates and the average Ct (threshold cycle) value was measured.  
555 When isoform switches were measured, values for NMD sensitive isoforms were normalized  
556 to the canonical isoforms to calculate  $\Delta\text{Ct}$ . For differentially expressed genes, the  
557 housekeeping gene C1orf43 values were subtracted from the target value to receive the  $\Delta\text{Ct}$ .  
558 To calculate the mean log<sub>2</sub> fold changes three biologically independent experiments were  
559 used. The log<sub>2</sub> fold changes are visualized as single data points and mean. All primers used  
560 in this study are listed in [Dataset EV6](#).

## 561 **RNA-sequencing and computational analyses**

562 Four different RNA-seq experiments were performed: 1) unaltered Flp-In T-REx 293 wild type  
563 (WT) cells and WT cells overexpressing the UPF3A WT construct via the PB-Transposase  
564 system. 2) Flp-In T-REx 293 wild type (WT) cells transfected with Luciferase siRNA and the  
565 UPF3A KO clones 14 and 20 treated with either Luciferase or UPF3B siRNAs. 3) The control

566 Flp-In T-REx 293 wild type (WT) cells with a Luciferase KD and the UPF3B KO clone 90  
567 transfected with Luciferase or UPF3A siRNAs. 4) WT cells transfected with Luciferase siRNA  
568 and the two UPF3 double KO cell lines 1 and 2 transfected with either Luciferase or UPF3B  
569 siRNAs. RNA was purified using peqGOLD TriFast (VWR Peqlab; for UPF3B KO samples) or  
570 the Direct-zol RNA MiniPrep kit including the recommended DNase I treatment (Zymo  
571 Research; all other samples) according to manufacturer's instructions. Three biological  
572 replicates were analyzed for each sample.

573 The Lexogen SIRV Set3 Spike-In Control Mix (SKU: 051.0x; for UPF3B KO samples) or ERCC  
574 RNA Spike-In Mix (for all other samples) that provides a set of external RNA controls was  
575 added to the total RNA to enable performance assessment. The Spike-Ins were used for  
576 quality control purposes, but not used for the final analysis of DGE, DTU or AS.

577 Using the Illumina TruSeq Stranded Total RNA kit library preparation was accomplished. This  
578 includes removing ribosomal RNA via biotinylated target-specific oligos combined with Ribo-  
579 Zero gold rRNA removal beads from 1 µg total RNA input. Cytoplasmic and mitochondrial  
580 rRNA gets depleted by the Ribo-Zero Human/Mouse/Rat kit. After a purification step, the RNA  
581 gets cleaved and fragmented. These fragments are then reverse transcribed into first strand  
582 cDNA using reverse transcriptase and random primers. In the next step, using DNA  
583 Polymerase I and RNase H second strand cDNA synthesis is performed. The resulting cDNA  
584 fragments then have the extension of a single 'A' base and adapter ligation. To create the final  
585 cDNA library the products are purified and enriched with PCR. Next library validation and  
586 quantification (Agilent tape station) are performed, followed by pooling of equimolar amounts  
587 of library. The pool itself was then quantified using the Peqlab KAPA Library Quantification Kit  
588 and the Applied Biosystems 7900HT Sequence Detection System and sequenced on an  
589 Illumina HiSeq4000 sequencing instrument with an PE75 protocol (UPF3B KO samples) or  
590 Illumina NovaSeq6000 sequencing instrument with an PE100 protocol (all other samples).

591 Reads were aligned against the human genome (version 38, GENCODE release 33 transcript  
592 annotations (Frankish *et al.*, 2019) supplemented with SIRVomeERCCome annotations from



593 Lexogen; obtained from <https://www.lexogen.com/sirvs/download/>) using the STAR read  
594 aligner (version 2.7.3a) (Dobin *et al.*, 2013). Transcript abundance estimates were computed  
595 with Salmon (version 1.3.0) (Patro *et al.*, 2017) with a decoy-aware transcriptome. After the  
596 import of transcript abundances, differential gene expression analysis was performed with the  
597 DESeq2(Love *et al.*, 2014) R package (version 1.28.1) with the significance thresholds  
598  $|\log_2\text{FoldChange}| > 1$  and adjusted p-value (padj)  $< 0.05$ . Differential splicing was detected with  
599 LeafCutter (version 0.2.9) (Li *et al.*, 2018) with the significance thresholds  $|\text{deltapsi}| > 0.1$  and  
600 adjusted p-value (p.adjust)  $< 0.05$ . Differential transcript usage was computed with  
601 IsoformSwitchAnalyzeR (version 1.10.0) and the DEXSeq method (Anders *et al.*, 2012; Ritchie  
602 *et al.*, 2015; Robinson & Oshlack, 2010; Soneson *et al.*, 2015; Vitting-Seerup & Sandelin, 2017,  
603 2019). Significance thresholds were  $|\text{dIF}| > 0.1$  and adjusted p-value (isoform\_switch\_q\_value)  
604  $< 0.05$ .

605 PTC status of transcript isoforms with annotated open reading frame was determined by  
606 IsoformSwitchAnalyzeR using the 50 nucleotide (nt) rule of NMD (Huber *et al.*, 2015; Vitting-  
607 Seerup *et al.*, 2014; Vitting-Seerup & Sandelin, 2017; Weischenfeldt *et al.*, 2012). Isoforms  
608 with no annotated open reading frame in GENCODE were designated “NA” in the PTC  
609 analysis.

610 All scripts and parameters for the RNA-Seq analysis are available at GitHub  
611 [<https://github.com/boehmv/UPF3>]. Overlaps of data sets were represented via nVenn(Perez-  
612 Silva *et al.*, 2018) or the ComplexHeatmap package (version 2.6.2)(Gu *et al.*, 2016). Integrative  
613 Genomics Viewer (IGV) (version 2.8.12)(Robinson *et al.*, 2011) snapshots were generated  
614 from mapped reads (BAM files) converted to binary tiled data (tdf), using Alfred(Rausch *et al.*,  
615 2019) with resolution set to 1 and IGVtools.

## 616 **SILAC and mass spectrometry**

617 HEK293 WT cells and the UPF3 dKO clone 2 expressing either FLAG-tagged GST or UPF2  
618 were labeled by culturing them for at least 5 passages in DMEM for SILAC medium (Thermo  
619 Fisher Scientific) supplemented with 9% FBS (Silantes), 1% Penicillin-Streptomycin and the



620 labeled amino acids Lysin and Arginine at final concentrations of 0.798 mmol/L and 0.393  
621 mmol/L, respectively. The three conditions were “light” (unlabeled Lys/ Arg), “medium” (Lys4/  
622 Arg6) and “heavy” (Lys8/ Arg10). Unlabeled proline was added in all conditions to prevent  
623 enzymatic Arginine-to-Proline conversion.

#### 624 **Experimental setup for SILAC with FLAG-tagged UPF2**

625 Expression of FLAG-GST and FLAG-UPF2 was induced for 72 h with 1x cumate. The cells  
626 lysed in 250 – 400 µl Buffer E with 1 µg/ml RNase and sonicated using the Bandelin Sonopuls  
627 mini20 with 15x 1s pulses at 50% amplitude with a 2.5 mm tip. Protein concentrations were  
628 measured using the Bradford assay and protein samples containing 1.6-1.7 mg/ml total protein  
629 were diluted. 600 µl of these samples were incubated with 30 µl Anti-FLAG M2 magnetic beads  
630 (Sigma) for 2 h on an overhead shaker at 4 °C. The beads were then washed three times for  
631 5 min with mild EJC-Buffer before eluting twice with 22 µl of a 200 µg/ml dilution of FLAG-  
632 peptides (Sigma) in 1x TBS for 10 min at RT and 200 rpm each elution step. Another elution  
633 with 1x SDS loading buffer was performed to analyze pull down efficiency via Western blot.  
634 The FLAG-peptide eluates were then mixed as followed: 7 µl of both light conditions, 14 µl  
635 medium and 14 µl heavy. 1 volume of SP3 (10% SDS in PBS) was added and the samples  
636 were reduced with 5 mM DTT and alkylated with 40 mM CAA.

637 Tryptic protein digestion was achieved by following a modified version of the single pot solid  
638 phase-enhanced sample preparation (SP3) (Hughes *et al.*, 2014). In brief, paramagnetic Sera-  
639 Mag speed beads (Thermo Fisher Scientific) were added to the reduced and alkylated protein  
640 samples and then mixed 1:1 with 100% acetonitrile (ACN). Protein-beads-complexes form  
641 during the 8 min incubation step, followed by capture using an in-house build magnetic rack.  
642 After two washing steps with 70% EtOH, the samples were washed once with 100% ACN.  
643 Then they were air-dried, resuspended in 5 µl 50 mM Triethylammonium bicarbonate  
644 supplemented with trypsin and LysC in an enzyme:substrate ratio of 1:50 and incubated for 16  
645 h at 37°C. The next day the beads were again resuspended in 200 µl ACN and after 8 min  
646 incubation placed on the magnetic rack. Tryptic peptides were washed with 100% ACN and

647 air-dried before dissolved in 4% DMSO and transfer into 96-well PCR tubes. The last step was  
648 the acidification with 1  $\mu$ l of 10% formic acid, then the samples were ready for mass spec  
649 analysis.

650 Proteomics analysis was performed by the proteomics core facility at CECAD via data-  
651 dependent acquisition using an Easy nLC1200 ultra high-performance liquid chromatography  
652 (UHPLC) system connected via nano electrospray ionization to a Q Exactive Plus instrument  
653 (all Thermo Scientific) running in DDA Top10 mode. Based on their hydrophobicity the tryptic  
654 peptides were separated using a chromatographic gradient of 60 min with a binary system of  
655 buffer A (0.1% formic acid) and buffer B (80% ACN, 0.1% formic acid) with a total flow of 250  
656 nl/min. For the separation in-house made analytical columns (length: 50 cm, inner diameter:  
657 75  $\mu$ m) containing 2.7  $\mu$ m C18 Poroshell EC120 beads (Agilent) that were heated to 50  $^{\circ}$ C in  
658 a column oven (Sonation) were used. Over a time period of 41 min Buffer B was linearly  
659 increased from 3% to 27% and then more rapidly up to 50% in 8 min. Finally, buffer B was  
660 increased to 95% within 1 min followed by 10 min at 95% to wash the analytical column. Full  
661 MS spectra (300-1,750 m/z) were accomplished with a resolution of 70,000, a maximum  
662 injection time of 20 ms and an AGC target of 3e6. In each full MS spectrum, the top 10 most  
663 abundant ions were selected for HCD fragmentation (NCE:27) with a quadrupole isolation  
664 width of 1.8 m/z and 10 s dynamic exclusion. The MS/MS spectra were then measured with a  
665 35,000 resolution, an injection time of maximum 110 ms and an AGC target of 5e5.

666 The MS RAW files were then analyzed with MaxQuant suite (version 1.5.3.8) on standard  
667 settings with the before mentioned SILAC labels (Cox & Mann, 2008). By matching against the  
668 human UniProt database the peptides were then identified using the Andromeda scoring  
669 algorithm (Cox *et al.*, 2011). Carbamidomethylation of cysteine was defined as a fixed  
670 modification, while methionine oxidation and N-terminal acetylation were variable  
671 modifications. The digestion protein was Trypsin/P. A false discovery rate (FDR) < 0.01 was  
672 used to identify peptide-spectrum matches and to quantify the proteins. Data processing and  
673 statistical analysis was performed in the Perseus software (version 1.6.1.1) (Tyanova *et al.*,

674 2016). Using the One-sample t-test the significantly changed proteins were identified ( $H_0 = 0$ ,  
675 fudge factor  $S_0 = 0.2$ ). Visualization was performed with RStudio (version 1.2.5033).

### 676 **Label-free quantitative mass spectrometry**

677 Twenty-four hours before expression of the FLAG-tagged constructs, the HEK 293 WT cells  
678 were treated with Luciferase siRNA and the UPF3B KO clone 90 and UPF3 dKO clone 1 cells  
679 were treated with siRNAs targeting residual UPF3B. The expression of either FLAG-GST or  
680 FLAG-UPF2 in WT cells and FLAG-UPF2 in the clones 90 and 1 was induced for 48 h with 1x.  
681 Lysis and sample preparation were performed as described above. MS analysis was  
682 performed as described above with a slightly adjusted gradient as followed: 3 – 30% B in 41  
683 min, 30 – 50% B in 8 min, 50-95% B in 1 min, followed by 10 min washing at 95%. LFQ values  
684 were calculated using the MaxLFQ algorithm (Cox *et al.*, 2014) in MaxQuant. Significantly  
685 changed proteins were identified by two-sample *t*-testing (fudge factor  $S_0 = 0.2$ ).

### 686 **Northern Blotting**

687 The cells were harvested in RNAsolv reagent and total RNA extraction was performed as  
688 described above. 3.0  $\mu\text{g}$  total RNA were resolved on a 1% agarose/0.4 M formaldehyde gel  
689 using the tricine/triethanolamine buffer system (Mansour & Pestov, 2013). Next a transfer on  
690 a nylon membrane (Roth) in 10x SSC followed. The blot was incubated overnight at 65°C in  
691 Church buffer containing [ $\alpha$ -32P]-GTP body-labeled RNA-probes for mRNA reporter detection  
692 (Voigt *et al.*, 2019). Ethidium bromide stained 28S and 18S rRNA served as loading controls.  
693 RNA signal detected with the Typhoon FLA 7000 (GE Healthcare) was quantified in a semi-  
694 automated manner using the ImageQuant TL 1D software with a rolling-ball background  
695 correction. EtBr-stained rRNA bands were quantified with the Image Lab 6.0.1 software (Bio-  
696 Rad). Signal intensities were normalized to the internal control (rRNA) before calculation of  
697 mean values. The control condition was set to unity (TPI WT for reporter assays), quantification  
698 results are shown as data points and mean.

## 699 **Protein conservation**

700 UPF3A (UniProt ID: Q9H1J1-1) and UPF3B (UniProt ID: Q9BZI7-2) protein sequences were  
701 aligned using Clustal Omega (<https://www.ebi.ac.uk/Tools/msa/clustalo/>) (Goujon *et al.*, 2010;  
702 Sievers *et al.*, 2011), viewed using Jalview (Waterhouse *et al.*, 2009), the conservation score  
703 extracted and used for visualization.

## 704 **Data Presentation**

705 Quantifications and calculations for other experiments were performed - if not indicated  
706 otherwise - with Microsoft Excel (version 1808) or R (version 4.0.4) and all plots were  
707 generated using IGV (version 2.8.12), GraphPad Prism 5, ggplot2 (version 3.3.3) or  
708 ComplexHeatmap (version 2.6.2) (Gu *et al.*, 2016).

## 709 **Data Availability**

710 The datasets and computer code produced in this study are available in the following  
711 databases:

- 712 • RNA-Seq data for UPF3B KO samples: ArrayExpress E-MTAB-10711  
713 (<https://www.ebi.ac.uk/arrayexpress/experiments/E-MTAB-10711>)
- 714 • RNA-Seq data for UPF3 dKO samples: ArrayExpress E-MTAB-10716  
715 (<https://www.ebi.ac.uk/arrayexpress/experiments/E-MTAB-10716>)
- 716 • RNA-Seq data for UPF3A KO/OE samples: ArrayExpress E-MTAB-10718  
717 (<https://www.ebi.ac.uk/arrayexpress/experiments/E-MTAB-10718>)
- 718 • Mass spectrometry proteomics data: PRIDE PXD027120  
719 (<https://www.ebi.ac.uk/pride/archive/projects/PXD027120>)
- 720 • Codes used in this study: GitHub (<https://github.com/boehmv/UPF3>)

721 All relevant data supporting the key findings of this study are available within the article and its  
722 Expanded View files or from the corresponding author upon reasonable request.

## 723 **Acknowledgements**

724 We thank members of the Gehring lab for discussions and reading of the manuscript. We also  
725 thank Marek Franitza and Christian Becker (Cologne Center for Genomics, CCG) for preparing  
726 the sequencing libraries and operating the sequencer. This work was supported by grants from  
727 the Deutsche Forschungsgemeinschaft to C.D. (DI 1501/8-1, DI1501/8-2) and N.H.G (GE  
728 2014/6-2 and GE 2014/10-1) and by the Center for Molecular Medicine Cologne (CMMC,  
729 Project C 07; to N.H.G.). V.B. was funded under the Institutional Strategy of the University of  
730 Cologne within the German Excellence Initiative. N.H.G. acknowledges funding by a  
731 Heisenberg professorship (GE 2014/7-1 and GE 2014/13-1) from the Deutsche  
732 Forschungsgemeinschaft. C.D was kindly supported by the Klaus Tschira Stiftung gGmbH  
733 (00.219.2013). This work was supported by the DFG Research Infrastructure as part of the  
734 Next Generation Sequencing Competence Network (project 423957469). NGS analyses were  
735 carried out at the production site WGGC Cologne.

## 736 **Author contributions**

737 Conceptualization: Niels H. Gehring, Volker Boehm and Damaris Wallmeroth;  
738 Methodology: Volker Boehm, Damaris Wallmeroth, Niels H. Gehring;  
739 Software: Volker Boehm;  
740 Investigation: Damaris Wallmeroth, Volker Boehm, and Jan-Wilm Lackmann;  
741 Resources and Data Curation: Volker Boehm, Janine Altmüller and Jan-Wilm Lackmann;  
742 Writing – Original Draft, Review & Editing: Damaris Wallmeroth, Volker Boehm, Niels H.  
743 Gehring;  
744 Visualization: Volker Boehm and Damaris Wallmeroth;  
745 Supervision: Niels H. Gehring and Volker Boehm;  
746 Funding Acquisition: Niels H. Gehring and Christoph Dieterich;  
747

748 **Conflict of interest**

749 None.

## 750 References

- 751 Amrani N, Ganesan R, Kervestin S, Mangus DA, Ghosh S, Jacobson A (2004) A faux 3'-UTR  
752 promotes aberrant termination and triggers nonsense-mediated mRNA decay. *Nature* 432:  
753 112-118
- 754 Anders S, Reyes A, Huber W (2012) Detecting differential usage of exons from RNA-seq data.  
755 *Genome Res* 22: 2008-2017
- 756 Boehm V, Gerbracht JV, Marx MC, Gehring NH (2016) Interrogating the degradation pathways  
757 of unstable mRNAs with XRN1-resistant sequences. *Nat Commun* 7: 13691
- 758 Boehm V, Kueckelmann S, Gerbracht JV, Kallabis S, Britto-Borges T, Altmüller J, Krüger M,  
759 Dieterich C, Gehring NH (2021) SMG5-SMG7 authorize nonsense-mediated mRNA decay by  
760 enabling SMG6 endonucleolytic activity. *Nat Commun* 12: 3965
- 761 Bono F, Ebert J, Unterholzner L, Guttler T, Izaurralde E, Conti E (2004) Molecular insights into  
762 the interaction of PYM with the Mago-Y14 core of the exon junction complex. *EMBO Rep* 5:  
763 304-310
- 764 Buchwald G, Ebert J, Basquin C, Sauliere J, Jayachandran U, Bono F, Le Hir H, Conti E (2010)  
765 Insights into the recruitment of the NMD machinery from the crystal structure of a core EJC-  
766 UPF3b complex. *Proc Natl Acad Sci U S A* 107: 10050-10055
- 767 Chamieh H, Ballut L, Bonneau F, Le Hir H (2008) NMD factors UPF2 and UPF3 bridge UPF1  
768 to the exon junction complex and stimulate its RNA helicase activity. *Nat Struct Mol Biol* 15:  
769 85-93
- 770 Chan WK, Bhalla AD, Le Hir H, Nguyen LS, Huang L, Gecz J, Wilkinson MF (2009) A UPF3-  
771 mediated regulatory switch that maintains RNA surveillance. *Nat Struct Mol Biol* 16: 747-753
- 772 Chen CY, Shyu AB (2003) Rapid deadenylation triggered by a nonsense codon precedes  
773 decay of the RNA body in a mammalian cytoplasmic nonsense-mediated decay pathway. *Mol*  
774 *Cell Biol* 23: 4805-4813
- 775 Cox J, Hein MY, Luber CA, Paron I, Nagaraj N, Mann M (2014) Accurate proteome-wide label-  
776 free quantification by delayed normalization and maximal peptide ratio extraction, termed  
777 MaxLFQ. *Mol Cell Proteomics* 13: 2513-2526
- 778 Cox J, Mann M (2008) MaxQuant enables high peptide identification rates, individualized  
779 p.p.b.-range mass accuracies and proteome-wide protein quantification. *Nat Biotechnol* 26:  
780 1367-1372
- 781 Cox J, Neuhauser N, Michalski A, Scheltema RA, Olsen JV, Mann M (2011) Andromeda: a  
782 peptide search engine integrated into the MaxQuant environment. *J Proteome Res* 10: 1794-  
783 1805
- 784 Dobin A, Davis CA, Schlesinger F, Drenkow J, Zaleski C, Jha S, Batut P, Chaisson M,  
785 Gingeras TR (2013) STAR: ultrafast universal RNA-seq aligner. *Bioinformatics* 29: 15-21
- 786 Dostie J, Dreyfuss G (2002) Translation is required to remove Y14 from mRNAs in the  
787 cytoplasm. *Curr Biol* 12: 1060-1067
- 788 Eberle AB, Lykke-Andersen S, Muhlemann O, Jensen TH (2009) SMG6 promotes  
789 endonucleolytic cleavage of nonsense mRNA in human cells. *Nat Struct Mol Biol* 16: 49-55



- 790 Frankish A, Diekhans M, Ferreira AM, Johnson R, Jungreis I, Loveland J, Mudge JM, Sisu C,  
791 Wright J, Armstrong J *et al* (2019) GENCODE reference annotation for the human and mouse  
792 genomes. *Nucleic Acids Res* 47: D766-D773
- 793 Frischmeyer PA, Dietz HC (1999) Nonsense-mediated mRNA decay in health and disease.  
794 *Hum Mol Genet* 8: 1893-1900
- 795 Gehring NH, Lamprinaki S, Kulozik AE, Hentze MW (2009) Disassembly of exon junction  
796 complexes by PYM. *Cell* 137: 536-548
- 797 Gehring NH, Neu-Yilik G, Schell T, Hentze MW, Kulozik AE (2003) Y14 and hUpf3b form an  
798 NMD-activating complex. *Mol Cell* 11: 939-949
- 799 Gerbracht JV, Boehm V, Britto-Borges T, Kallabis S, Wiederstein JL, Ciriello S, Aschemeier  
800 DU, Kruger M, Frese CK, Altmuller J *et al* (2020) CASC3 promotes transcriptome-wide  
801 activation of nonsense-mediated decay by the exon junction complex. *Nucleic Acids Res* 48:  
802 8626-8644
- 803 Goujon M, McWilliam H, Li W, Valentin F, Squizzato S, Paern J, Lopez R (2010) A new  
804 bioinformatics analysis tools framework at EMBL-EBI. *Nucleic Acids Res* 38: W695-699
- 805 Gu Z, Eils R, Schlesner M (2016) Complex heatmaps reveal patterns and correlations in  
806 multidimensional genomic data. *Bioinformatics* 32: 2847-2849
- 807 He F, Li X, Spatrick P, Casillo R, Dong S, Jacobson A (2003) Genome-wide analysis of mRNAs  
808 regulated by the nonsense-mediated and 5' to 3' mRNA decay pathways in yeast. *Mol Cell* 12:  
809 1439-1452
- 810 Hogg JR, Goff SP (2010) Upf1 senses 3'UTR length to potentiate mRNA decay. *Cell* 143: 379-  
811 389
- 812 Huber W, Carey VJ, Gentleman R, Anders S, Carlson M, Carvalho BS, Bravo HC, Davis S,  
813 Gatto L, Girke T *et al* (2015) Orchestrating high-throughput genomic analysis with  
814 Bioconductor. *Nat Methods* 12: 115-121
- 815 Hughes CS, Foehr S, Garfield DA, Furlong EE, Steinmetz LM, Krijgsveld J (2014)  
816 Ultrasensitive proteome analysis using paramagnetic bead technology. *Mol Syst Biol* 10: 757
- 817 Huntzinger E, Kashima I, Fauser M, Sauliere J, Izaurralde E (2008) SMG6 is the catalytic  
818 endonuclease that cleaves mRNAs containing nonsense codons in metazoan. *RNA* 14: 2609-  
819 2617
- 820 Hurt JA, Robertson AD, Burge CB (2013) Global analyses of UPF1 binding and function reveal  
821 expanded scope of nonsense-mediated mRNA decay. *Genome Res* 23: 1636-1650
- 822 Hwang J, Maquat LE (2011) Nonsense-mediated mRNA decay (NMD) in animal  
823 embryogenesis: to die or not to die, that is the question. *Current opinion in genetics &*  
824 *development* 21: 422-430
- 825 Kadlec J, Izaurralde E, Cusack S (2004) The structural basis for the interaction between  
826 nonsense-mediated mRNA decay factors UPF2 and UPF3. *Nat Struct Mol Biol* 11: 330-337
- 827 Kashima I, Yamashita A, Izumi N, Kataoka N, Morishita R, Hoshino S, Ohno M, Dreyfuss G,  
828 Ohno S (2006) Binding of a novel SMG-1-Upf1-eRF1-eRF3 complex (SURF) to the exon  
829 junction complex triggers Upf1 phosphorylation and nonsense-mediated mRNA decay. *Genes*  
830 *Dev* 20: 355-367

- 831 Kervestin S, Jacobson A (2012) NMD: a multifaceted response to premature translational  
832 termination. *Nature reviews Molecular cell biology* 13: 700-712
- 833 Kim VN, Kataoka N, Dreyfuss G (2001) Role of the nonsense-mediated decay factor hUpf3 in  
834 the splicing-dependent exon-exon junction complex. *Science* 293: 1832-1836
- 835 Kunz JB, Neu-Yilik G, Hentze MW, Kulozik AE, Gehring NH (2006) Functions of hUpf3a and  
836 hUpf3b in nonsense-mediated mRNA decay and translation. *RNA* 12: 1015-1022
- 837 Kurosaki T, Maquat LE (2013) Rules that govern UPF1 binding to mRNA 3' UTRs. *Proc Natl  
838 Acad Sci U S A* 110: 3357-3362
- 839 Le Hir H, Gatfield D, Izaurralde E, Moore MJ (2001) The exon-exon junction complex provides  
840 a binding platform for factors involved in mRNA export and nonsense-mediated mRNA decay.  
841 *EMBO J* 20: 4987-4997
- 842 Le Hir H, Izaurralde E, Maquat LE, Moore MJ (2000) The spliceosome deposits multiple  
843 proteins 20-24 nucleotides upstream of mRNA exon-exon junctions. *EMBO J* 19: 6860-6869
- 844 Lejeune F, Li X, Maquat LE (2003) Nonsense-mediated mRNA decay in mammalian cells  
845 involves decapping, deadenylating, and exonucleolytic activities. *Mol Cell* 12: 675-687
- 846 Lelivelt MJ, Culbertson MR (1999) Yeast Upf proteins required for RNA surveillance affect  
847 global expression of the yeast transcriptome. *Mol Cell Biol* 19: 6710-6719
- 848 Li T, Shi Y, Wang P, Guachalla LM, Sun B, Joerss T, Chen YS, Groth M, Krueger A, Platzer  
849 M *et al* (2015) Smg6/Est1 licenses embryonic stem cell differentiation via nonsense-mediated  
850 mRNA decay. *EMBO J* 34: 1630-1647
- 851 Li YI, Knowles DA, Humphrey J, Barbeira AN, Dickinson SP, Im HK, Pritchard JK (2018)  
852 Annotation-free quantification of RNA splicing using LeafCutter. *Nat Genet* 50: 151-158
- 853 Love MI, Huber W, Anders S (2014) Moderated estimation of fold change and dispersion for  
854 RNA-seq data with DESeq2. *Genome biology* 15: 550
- 855 Lykke-Andersen J, Shu MD, Steitz JA (2000) Human Upf proteins target an mRNA for  
856 nonsense-mediated decay when bound downstream of a termination codon. *Cell* 103: 1121-  
857 1131
- 858 Lykke-Andersen S, Chen Y, Ardal BR, Lilje B, Waage J, Sandelin A, Jensen TH (2014) Human  
859 nonsense-mediated RNA decay initiates widely by endonucleolysis and targets snoRNA host  
860 genes. *Genes Dev* 28: 2498-2517
- 861 Mansour FH, Pestov DG (2013) Separation of long RNA by agarose-formaldehyde gel  
862 electrophoresis. *Anal Biochem* 441: 18-20
- 863 McIlwain DR, Pan Q, Reilly PT, Elia AJ, McCracken S, Wakeham AC, Itie-Youten A, Blencowe  
864 BJ, Mak TW (2010) Smg1 is required for embryogenesis and regulates diverse genes via  
865 alternative splicing coupled to nonsense-mediated mRNA decay. *Proc Natl Acad Sci U S A*  
866 107: 12186-12191
- 867 Medghalchi SM, Frischmeyer PA, Mendell JT, Kelly AG, Lawler AM, Dietz HC (2001) Rent1, a  
868 trans-effector of nonsense-mediated mRNA decay, is essential for mammalian embryonic  
869 viability. *Hum Mol Genet* 10: 99-105

- 870 Melero R, Buchwald G, Castano R, Raabe M, Gil D, Lazaro M, Urlaub H, Conti E, Llorca O  
871 (2012) The cryo-EM structure of the UPF-EJC complex shows UPF1 poised toward the RNA  
872 3' end. *Nat Struct Mol Biol* 19: 498-505, S491-492
- 873 Mendell JT, Sharifi NA, Meyers JL, Martinez-Murillo F, Dietz HC (2004) Nonsense surveillance  
874 regulates expression of diverse classes of mammalian transcripts and mutes genomic noise.  
875 *Nat Genet* 36: 1073-1078
- 876 Metzstein MM, Krasnow MA (2006) Functions of the nonsense-mediated mRNA decay  
877 pathway in *Drosophila* development. *PLoS Genet* 2: e180
- 878 Neu-Yilik G, Raimondeau E, Eliseev B, Yeramala L, Amthor B, Deniaud A, Huard K,  
879 Kerschgens K, Hentze MW, Schaffitzel C *et al* (2017) Dual function of UPF3B in early and late  
880 translation termination. *EMBO J* 36: 2968-2986
- 881 Nguyen LS, Jolly L, Shoubridge C, Chan WK, Huang L, Laumonnier F, Raynaud M, Hackett  
882 A, Field M, Rodriguez J *et al* (2012) Transcriptome profiling of UPF3B/NMD-deficient  
883 lymphoblastoid cells from patients with various forms of intellectual disability. *Mol Psychiatry*  
884 17: 1103-1115
- 885 Nguyen LS, Wilkinson MF, Gecz J (2014) Nonsense-mediated mRNA decay: inter-individual  
886 variability and human disease. *Neurosci Biobehav Rev* 46 Pt 2: 175-186
- 887 Patro R, Duggal G, Love MI, Irizarry RA, Kingsford C (2017) Salmon provides fast and bias-  
888 aware quantification of transcript expression. *Nat Methods* 14: 417-419
- 889 Peixeiro I, Inacio A, Barbosa C, Silva AL, Liebhaber SA, Romao L (2012) Interaction of  
890 PABPC1 with the translation initiation complex is critical to the NMD resistance of AUG-  
891 proximal nonsense mutations. *Nucleic Acids Res* 40: 1160-1173
- 892 Perez-Silva JG, Araujo-Voces M, Quesada V (2018) nVenn: generalized, quasi-proportional  
893 Venn and Euler diagrams. *Bioinformatics* 34: 2322-2324
- 894 Rausch T, Hsi-Yang Fritz M, Korbel JO, Benes V (2019) Alfred: interactive multi-sample BAM  
895 alignment statistics, feature counting and feature annotation for long- and short-read  
896 sequencing. *Bioinformatics* 35: 2489-2491
- 897 Rehwinkel J, Letunic I, Raes J, Bork P, Izaurralde E (2005) Nonsense-mediated mRNA decay  
898 factors act in concert to regulate common mRNA targets. *RNA* 11: 1530-1544
- 899 Ritchie ME, Phipson B, Wu D, Hu Y, Law CW, Shi W, Smyth GK (2015) limma powers  
900 differential expression analyses for RNA-sequencing and microarray studies. *Nucleic Acids*  
901 *Res* 43: e47
- 902 Robinson JT, Thorvaldsdottir H, Winckler W, Guttman M, Lander ES, Getz G, Mesirov JP  
903 (2011) Integrative genomics viewer. *Nat Biotechnol* 29: 24-26
- 904 Robinson MD, Oshlack A (2010) A scaling normalization method for differential expression  
905 analysis of RNA-seq data. *Genome biology* 11: R25
- 906 Serin G, Gersappe A, Black JD, Aronoff R, Maquat LE (2001) Identification and  
907 characterization of human orthologues to *Saccharomyces cerevisiae* Upf2 protein and Upf3  
908 protein (*Caenorhabditis elegans* SMG-4). *Mol Cell Biol* 21: 209-223

- 909 Shum EY, Jones SH, Shao A, Dumdie J, Krause MD, Chan WK, Lou CH, Espinoza JL, Song  
910 HW, Phan MH *et al* (2016) The Antagonistic Gene Paralogs Upf3a and Upf3b Govern  
911 Nonsense-Mediated RNA Decay. *Cell* 165: 382-395
- 912 Sievers F, Wilm A, Dineen D, Gibson TJ, Karplus K, Li W, Lopez R, McWilliam H, Remmert M,  
913 Soding J *et al* (2011) Fast, scalable generation of high-quality protein multiple sequence  
914 alignments using Clustal Omega. *Mol Syst Biol* 7: 539
- 915 Sonesson C, Love MI, Robinson MD (2015) Differential analyses for RNA-seq: transcript-level  
916 estimates improve gene-level inferences. *F1000Res* 4: 1521
- 917 Sureau A, Gattoni R, Dooghe Y, Stevenin J, Soret J (2001) SC35 autoregulates its expression  
918 by promoting splicing events that destabilize its mRNAs. *EMBO J* 20: 1785-1796
- 919 Tyanova S, Temu T, Sinitcyn P, Carlson A, Hein MY, Geiger T, Mann M, Cox J (2016) The  
920 Perseus computational platform for comprehensive analysis of (prote)omics data. *Nat Methods*  
921 13: 731-740
- 922 Vitting-Seerup K, Porse BT, Sandelin A, Waage J (2014) spliceR: an R package for  
923 classification of alternative splicing and prediction of coding potential from RNA-seq data. *BMC*  
924 *Bioinformatics* 15: 81
- 925 Vitting-Seerup K, Sandelin A (2017) The Landscape of Isoform Switches in Human Cancers.  
926 *Mol Cancer Res* 15: 1206-1220
- 927 Vitting-Seerup K, Sandelin A (2019) IsoformSwitchAnalyzerR: analysis of changes in genome-  
928 wide patterns of alternative splicing and its functional consequences. *Bioinformatics* 35: 4469-  
929 4471
- 930 Voigt F, Gerbracht JV, Boehm V, Horvathova I, Eglinger J, Chao JA, Gehring NH (2019)  
931 Detection and quantification of RNA decay intermediates using XRN1-resistant reporter  
932 transcripts. *Nat Protoc* 14: 1603-1633
- 933 Waterhouse AM, Procter JB, Martin DM, Clamp M, Barton GJ (2009) Jalview Version 2--a  
934 multiple sequence alignment editor and analysis workbench. *Bioinformatics* 25: 1189-1191
- 935 Weischenfeldt J, Damgaard I, Bryder D, Theilgaard-Monch K, Thoren LA, Nielsen FC,  
936 Jacobsen SE, Nerlov C, Porse BT (2008) NMD is essential for hematopoietic stem and  
937 progenitor cells and for eliminating by-products of programmed DNA rearrangements. *Genes*  
938 *Dev* 22: 1381-1396
- 939 Weischenfeldt J, Waage J, Tian G, Zhao J, Damgaard I, Jakobsen JS, Kristiansen K, Krogh  
940 A, Wang J, Porse BT (2012) Mammalian tissues defective in nonsense-mediated mRNA decay  
941 display highly aberrant splicing patterns. *Genome biology* 13: R35
- 942 Weng Y, Czaplinski K, Peltz SW (1996) Identification and characterization of mutations in the  
943 UPF1 gene that affect nonsense suppression and the formation of the Upf protein complex but  
944 not mRNA turnover. *Mol Cell Biol* 16: 5491-5506
- 945 Wittkopp N, Huntzinger E, Weiler C, Sauliere J, Schmidt S, Sonawane M, Izaurralde E (2009)  
946 Nonsense-mediated mRNA decay effectors are essential for zebrafish embryonic development  
947 and survival. *Mol Cell Biol* 29: 3517-3528
- 948 Yamashita A, Ohnishi T, Kashima I, Taya Y, Ohno S (2001) Human SMG-1, a novel  
949 phosphatidylinositol 3-kinase-related protein kinase, associates with components of the mRNA

950 surveillance complex and is involved in the regulation of nonsense-mediated mRNA decay.  
951 *Genes Dev* 15: 2215-2228

952 Yi Z, Arvola RM, Myers S, Dilsavor CN, Abu Alhasan R, Carter BN, Patton RD, Bundschuh R,  
953 Singh G (2021) Mammalian UPF3A and UPF3B activate NMD independently of their EJC  
954 binding. *bioRxiv*: 2021.2007.2002.450872

955 Zund D, Gruber AR, Zavolan M, Muhlemann O (2013) Translation-dependent displacement of  
956 UPF1 from coding sequences causes its enrichment in 3' UTRs. *Nat Struct Mol Biol* 20: 936-  
957 943

958
